# Supplementary material for: Conversion of Natural Narciclasine to Its C-1 and C-6 Derivatives and Their Antitumor Activity Evaluation: Some Unusual Chemistry of Narciclasine
Source: MDPI journal article supplement (doi:10.3390/molecules27134141), 2022-06-28

# Supporting Material

## Conversion of natural narciclasine to its C-1 and C-6 derivatives and their biological evaluation. Some unusual chemistry of narciclasine.

Juana Goulart Stollmaier <sup>1,\*</sup>, Jared Thomson <sup>1</sup>, Mary Ann Endoma-Arias <sup>1</sup>, Razvan Simionescu <sup>1</sup>, Alexandra Vernaza <sup>2</sup>, Nakya Mesa-Diaz <sup>2</sup>, Mitchell Smith <sup>2</sup>, Liqin Du <sup>2</sup>, Alexander Kornienko <sup>2,\*</sup>, and Tomas Hudlicky<sup>1</sup>

<sup>1</sup> Department of Chemistry, Brock University, 1812 Sir Isaac Brock Way, St. Catharines, ON L2S 3A1, Canada; jt15gq@brocku.ca (J.T.); maryann.arias@bpt.eurofinsca.com (M.A.E-A.); rsimionescu@brocku.ca (R.S.) thudlicky@brocku.ca (T.H.)

<sup>2</sup> Department of Chemistry and Biochemistry, Texas State University, San Marcos, TX 78666, USA; a\_v651@txstate.edu (A.V.); nlm59@txstate.edu (N.M-D.); mts85@txstate.edu (M.S.); l\_d141@txstate.edu (L.D.)

\* Correspondence: juanagstollmaier@gmail.com (J.G.S); a\_k76@txstate.edu (A.K.)

## Table of Contents

|                                                                     |    |
|---------------------------------------------------------------------|----|
| Figure S1. Biological Activity .....                                | 4  |
| Selected Spectra .....                                              | 5  |
| Figure S2. <sup>1</sup> H-NMR of <b>6</b> .....                     | 5  |
| Figure S3. <sup>13</sup> C-NMR of <b>6</b> .....                    | 5  |
| Figure S4. <sup>1</sup> H-NMR of <b>9</b> .....                     | 6  |
| Figure S5. <sup>13</sup> C-NMR of <b>9</b> .....                    | 6  |
| Figure S6. <sup>1</sup> H-NMR of <b>10</b> .....                    | 7  |
| Figure S7. <sup>13</sup> C-NMR of <b>10</b> .....                   | 7  |
| Figure S8. <sup>1</sup> H-NMR of <b>11</b> .....                    | 8  |
| Figure S. <sup>13</sup> C-NMR of <b>11</b> .....                    | 8  |
| Figure S10. <sup>1</sup> H-NMR of <b>12a</b> .....                  | 9  |
| Figure S11. <sup>13</sup> C-NMR of <b>12a</b> .....                 | 9  |
| Figure S12. <sup>1</sup> H-NMR of <b>12b</b> .....                  | 10 |
| Figure S13. <sup>13</sup> C-NMR of <b>12b</b> .....                 | 10 |
| Figure S14. <sup>1</sup> H-NMR of <b>14</b> .....                   | 11 |
| Figure S15. <sup>13</sup> C-NMR of <b>14</b> .....                  | 11 |
| Figure S16. <sup>1</sup> H-NMR of <b>15</b> .....                   | 12 |
| Figure S17. <sup>13</sup> C-NMR of <b>15</b> .....                  | 12 |
| Figure S18. <sup>1</sup> H-NMR of <b>16</b> .....                   | 13 |
| Figure S19. <sup>13</sup> C-NMR of <b>16</b> .....                  | 14 |
| Figure S20. <sup>1</sup> H-NMR of <b>17a</b> .....                  | 15 |
| Figure S21. <sup>13</sup> C-NMR of <b>17a</b> .....                 | 15 |
| Figure S22. <sup>1</sup> H-NMR of <b>24</b> .....                   | 16 |
| Figure S23. <sup>13</sup> C-NMR of <b>24</b> .....                  | 16 |
| Figure S24. <sup>1</sup> H- <sup>15</sup> N HSQC of <b>24</b> ..... | 17 |
| Figure S25. <sup>1</sup> H- <sup>15</sup> N HMBC of <b>24</b> ..... | 17 |
| Figure S26. <sup>1</sup> H-NMR of <b>25</b> .....                   | 18 |
| Figure S27. <sup>13</sup> C-NMR of <b>25</b> .....                  | 18 |
| Figure S28. <sup>19</sup> F-NMR of <b>25</b> .....                  | 19 |
| Figure S29. <sup>1</sup> H-NMR of <b>26</b> .....                   | 20 |
| Figure S30. <sup>13</sup> C-NMR of <b>26</b> .....                  | 20 |
| Figure S31. <sup>1</sup> H- <sup>15</sup> N HMBC of <b>26</b> ..... | 21 |

|                                                     |    |
|-----------------------------------------------------|----|
| Figure S32. $^1\text{H}$ -NMR of <b>27</b> .....    | 22 |
| Figure S33. $^{13}\text{C}$ -NMR of <b>27</b> ..... | 22 |
| Figure S34. $^1\text{H}$ -NMR of <b>28</b> .....    | 23 |
| Figure S35. $^{13}\text{C}$ -NMR of <b>28</b> ..... | 23 |
| Figure S36. $^1\text{H}$ -NMR of <b>29</b> .....    | 24 |
| Figure S37. $^{13}\text{C}$ -NMR of <b>29</b> ..... | 24 |
| Figure S38. $^1\text{H}$ -NMR of <b>30</b> .....    | 25 |
| Figure S39. $^{13}\text{C}$ -NMR of <b>30</b> ..... | 25 |
| Figure S40. $^1\text{H}$ -NMR of <b>31</b> .....    | 26 |
| Figure S41. $^{13}\text{C}$ -NMR of <b>31</b> ..... | 26 |
| Figure S42. $^1\text{H}$ -NMR of <b>33</b> .....    | 27 |
| Figure S43. $^{13}\text{C}$ -NMR of <b>33</b> ..... | 27 |

**Figure S1. Biological Activity**

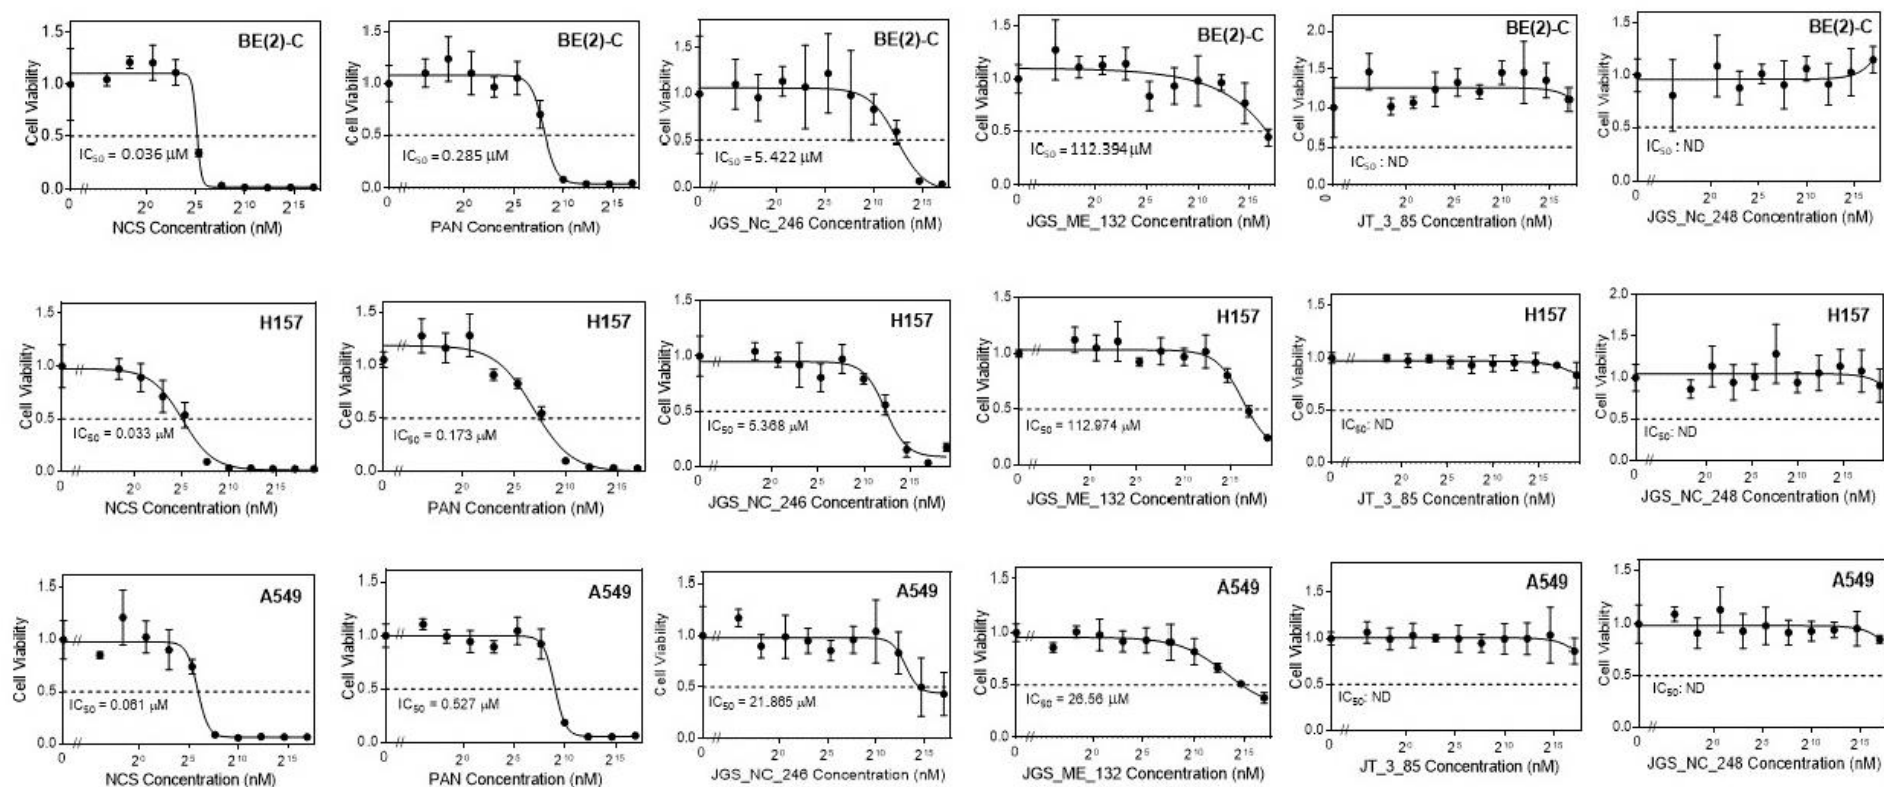

**Suppl. Figure S1. Dose-dependent cytotoxicity of compounds in cancer cell lines.** Cells were treated with a serial of dilutions of each compound in three replicates in 96-well plates for 4 days, and cell viability was measured using MTT assay. Shown in each figure is dose-dependent response of the indicated cells to the indicated compound, with the dotted line signifying the IC<sub>50</sub>. ND, not determined (>500 μM). NCS = 1, PAN = 2, JGS\_Nc\_246 = 29, JGS\_ME\_132 = 30, JT\_3\_85 = 31, JGS\_Nc\_248 = 33.

## Selected Spectra

Figure S2.  $^1\text{H}$ -NMR of **6**

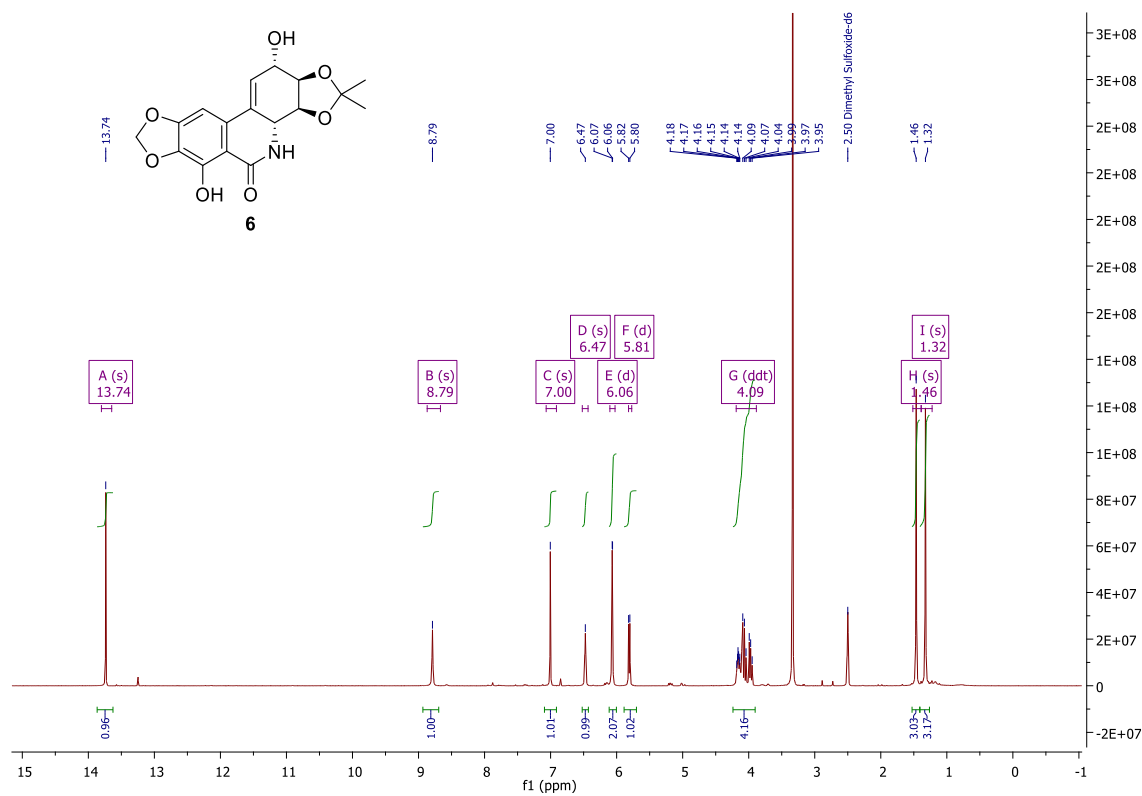

Figure S3.  $^{13}\text{C}$ -NMR of **6**

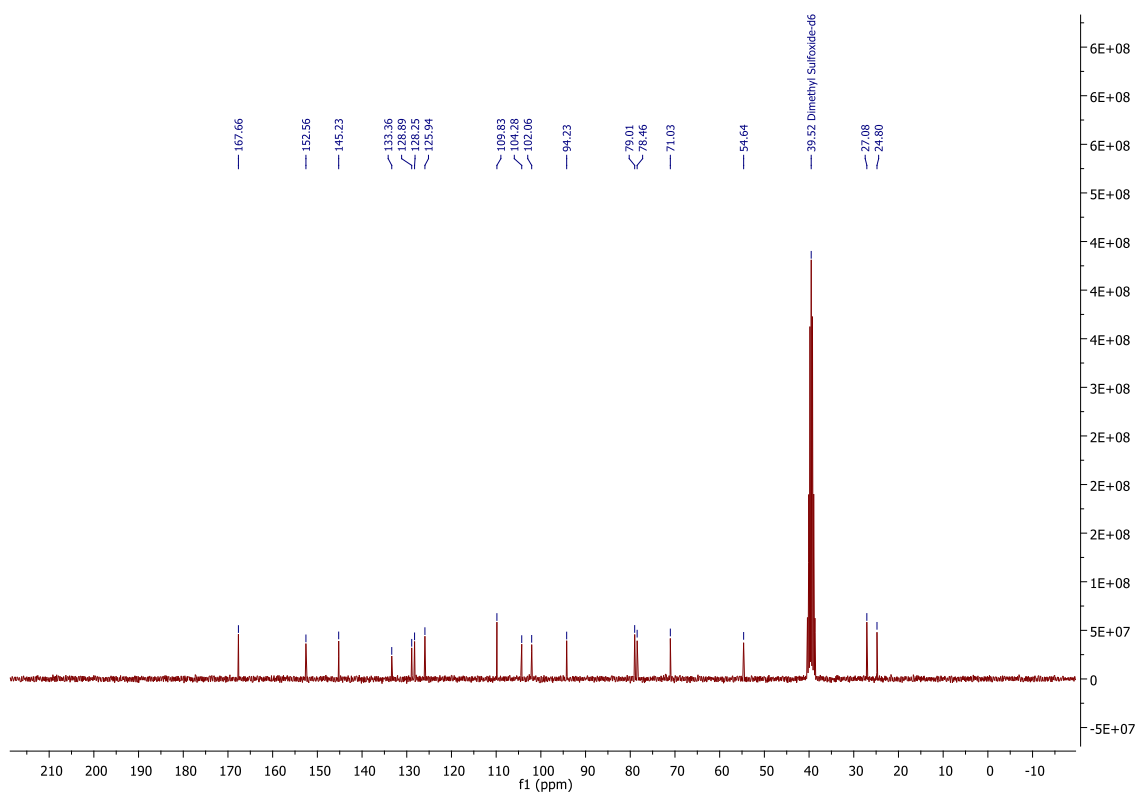

Figure S4.  $^1\text{H}$ -NMR of **9**

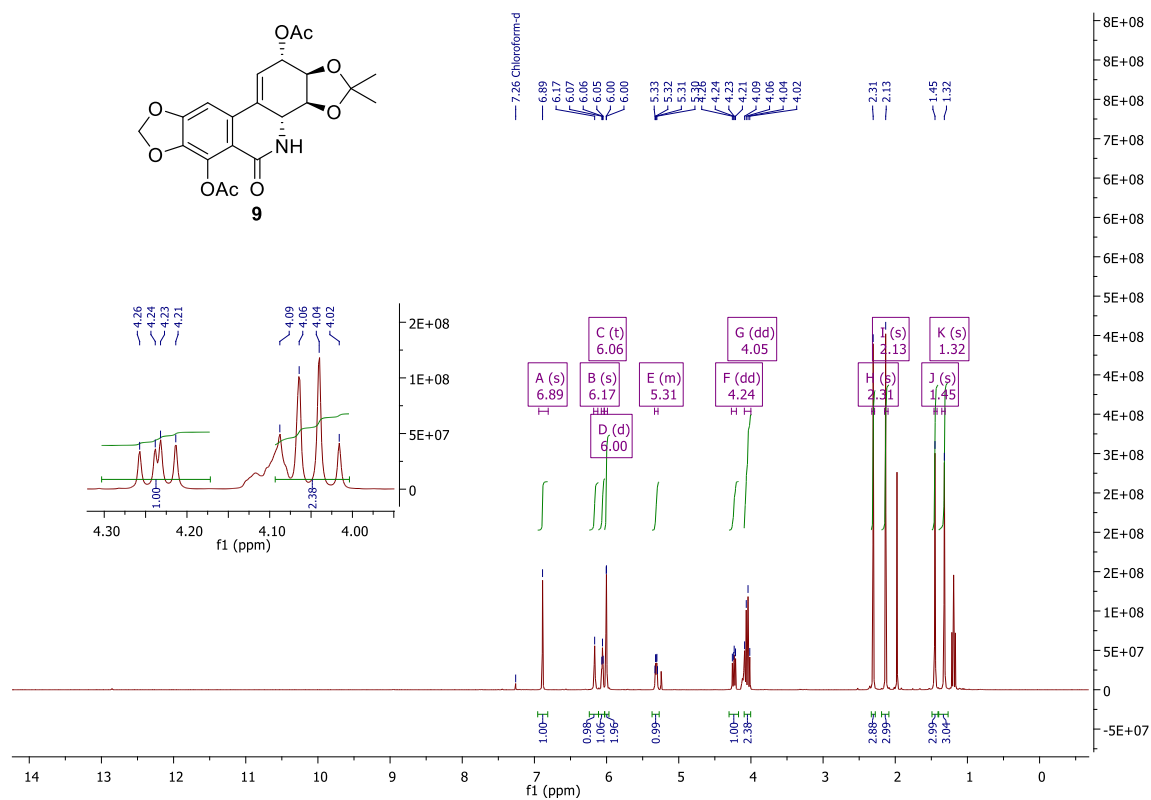

Figure S5.  $^{13}\text{C}$ -NMR of **9**

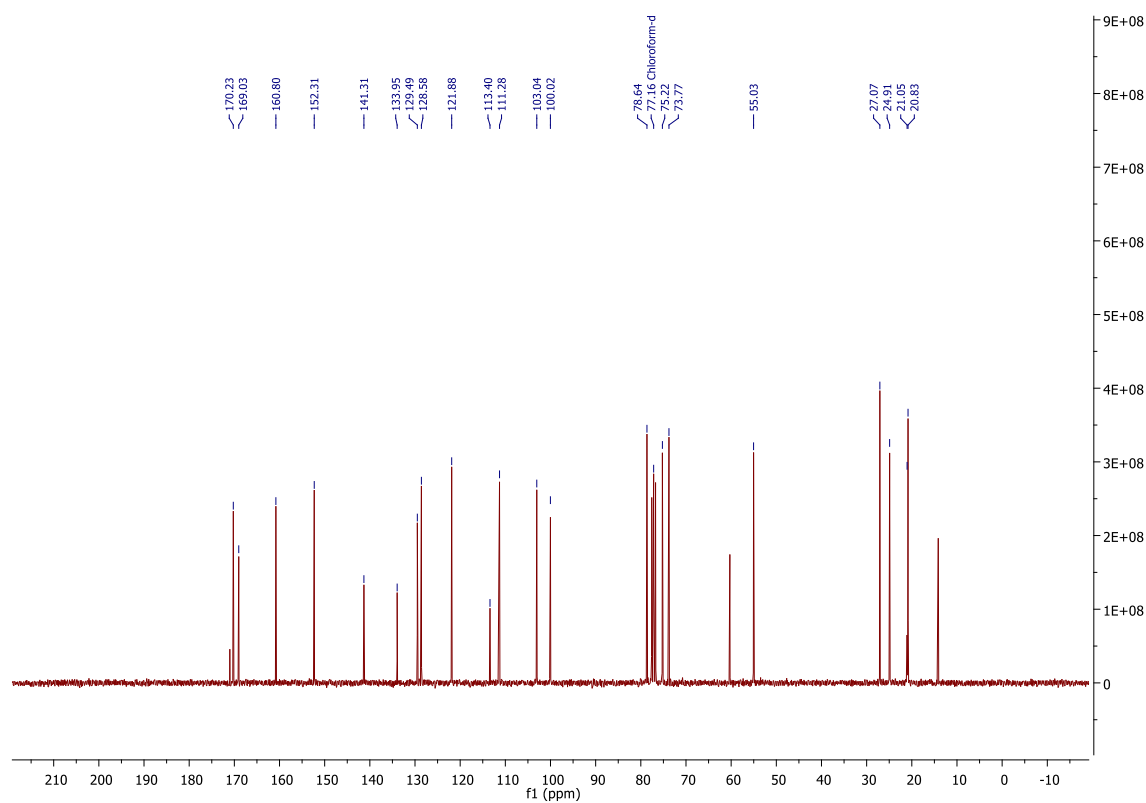

Figure S6.  $^1\text{H}$ -NMR of **10**

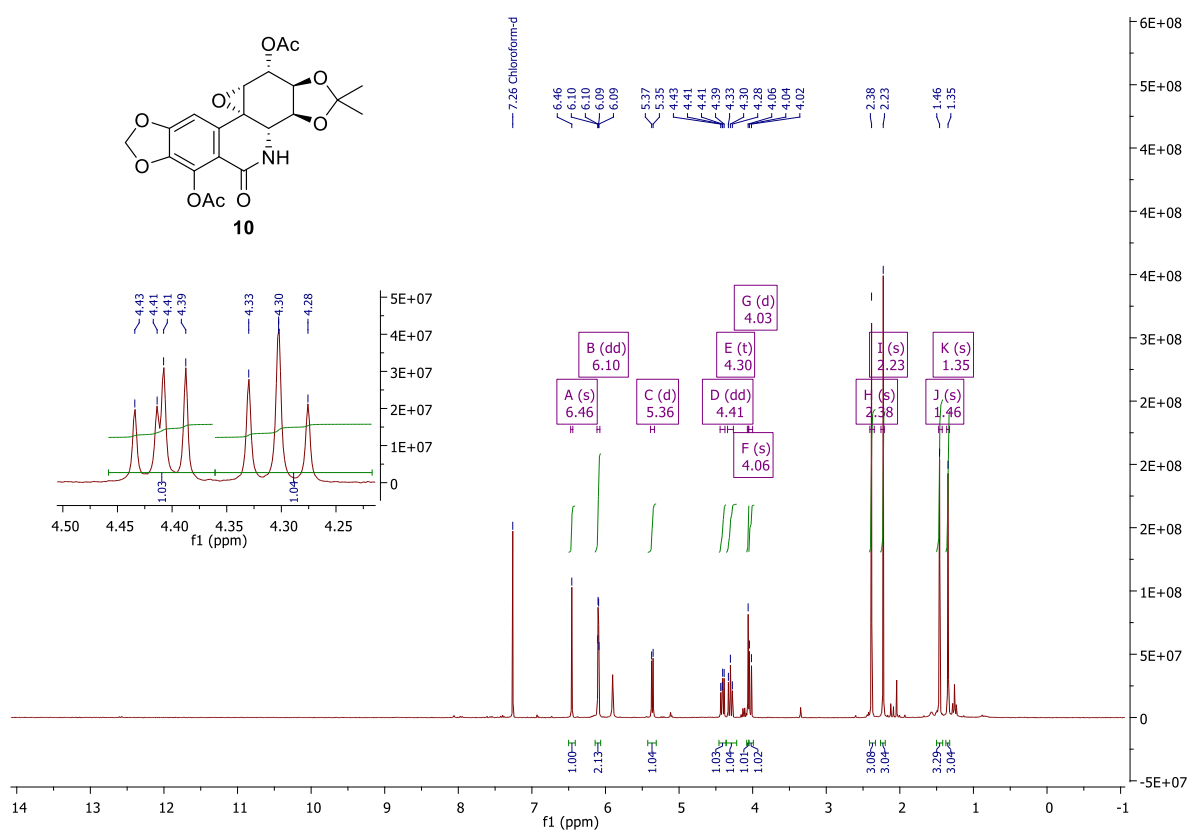

Figure S7.  $^{13}\text{C}$ -NMR of **10**

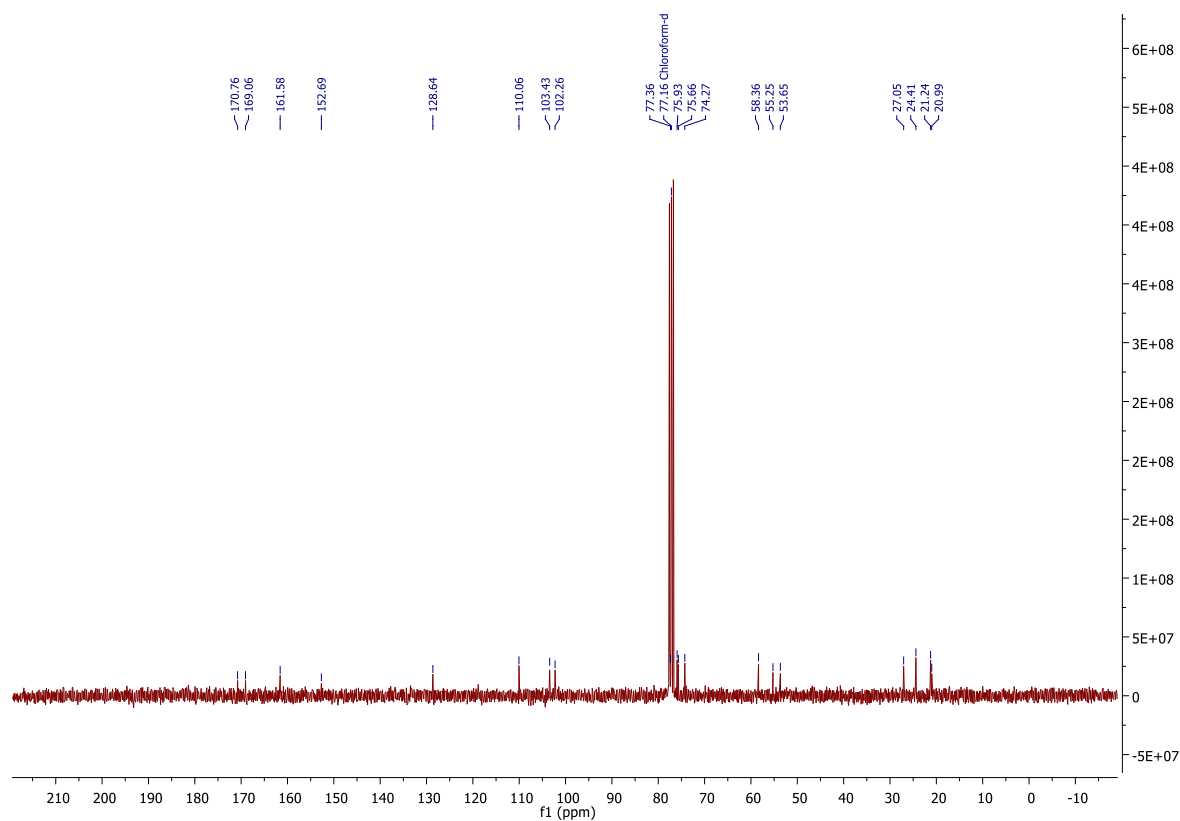

Figure S8.  $^1\text{H}$ -NMR of **11**

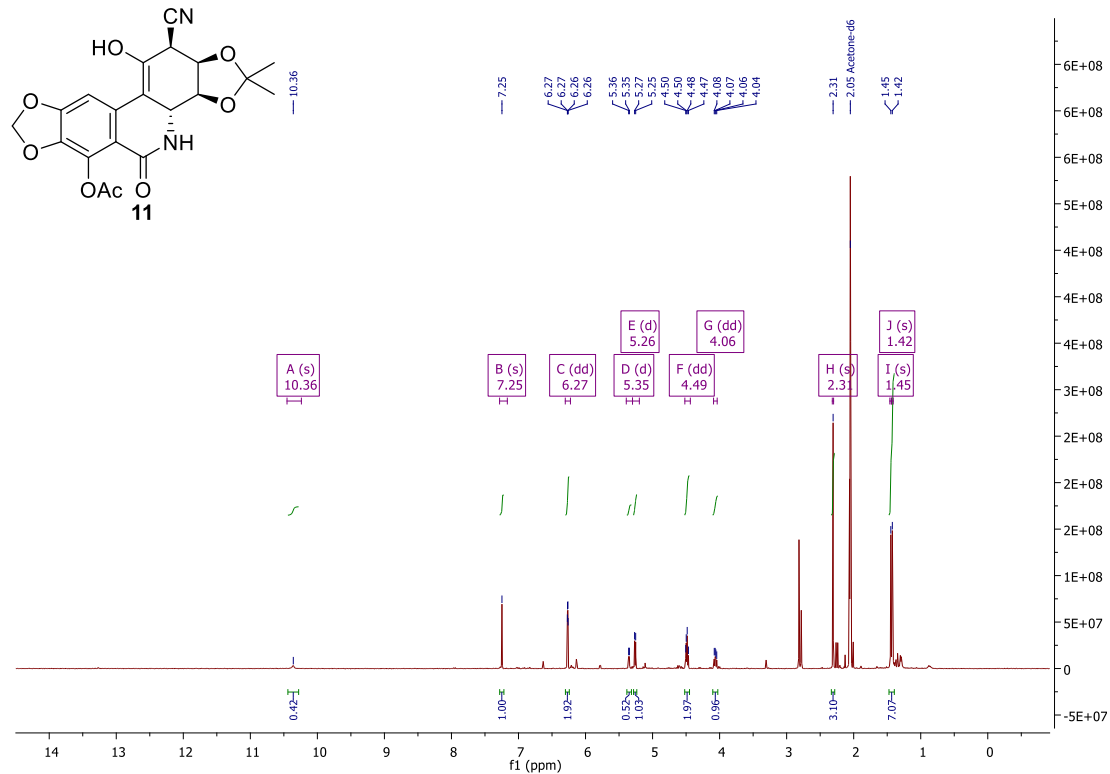

Figure S9.  $^{13}\text{C}$ -NMR of **11**

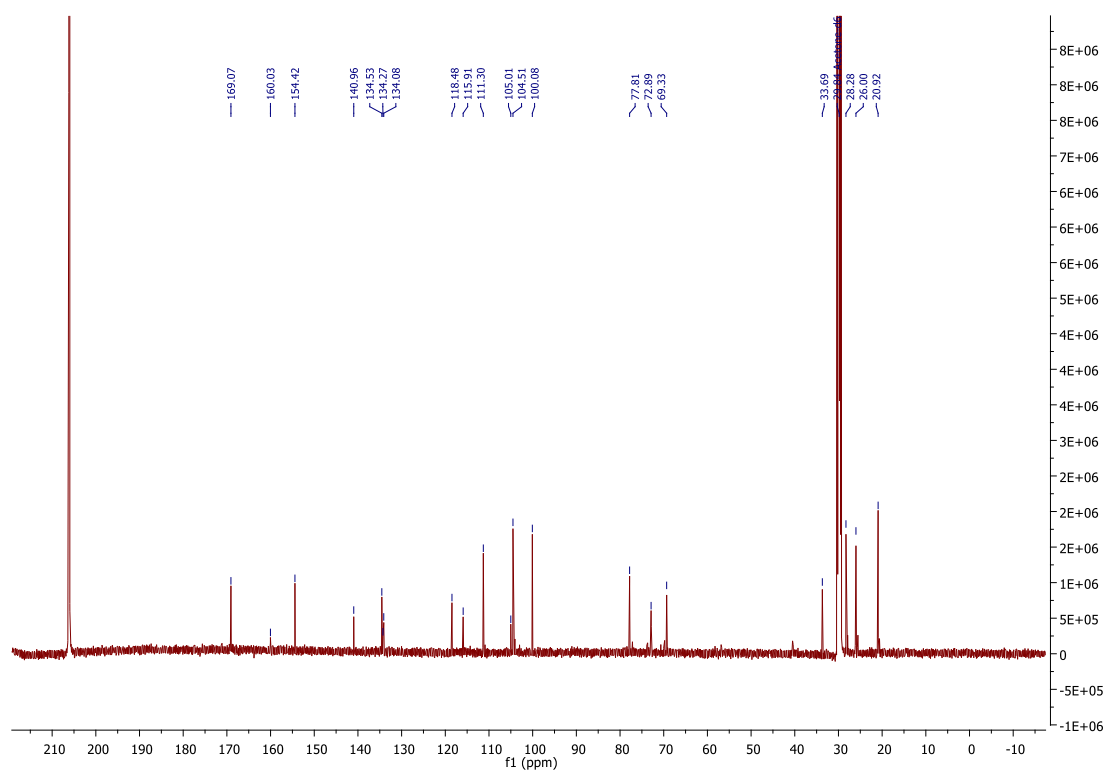



Figure S10.  $^1\text{H}$ -NMR of **12a**

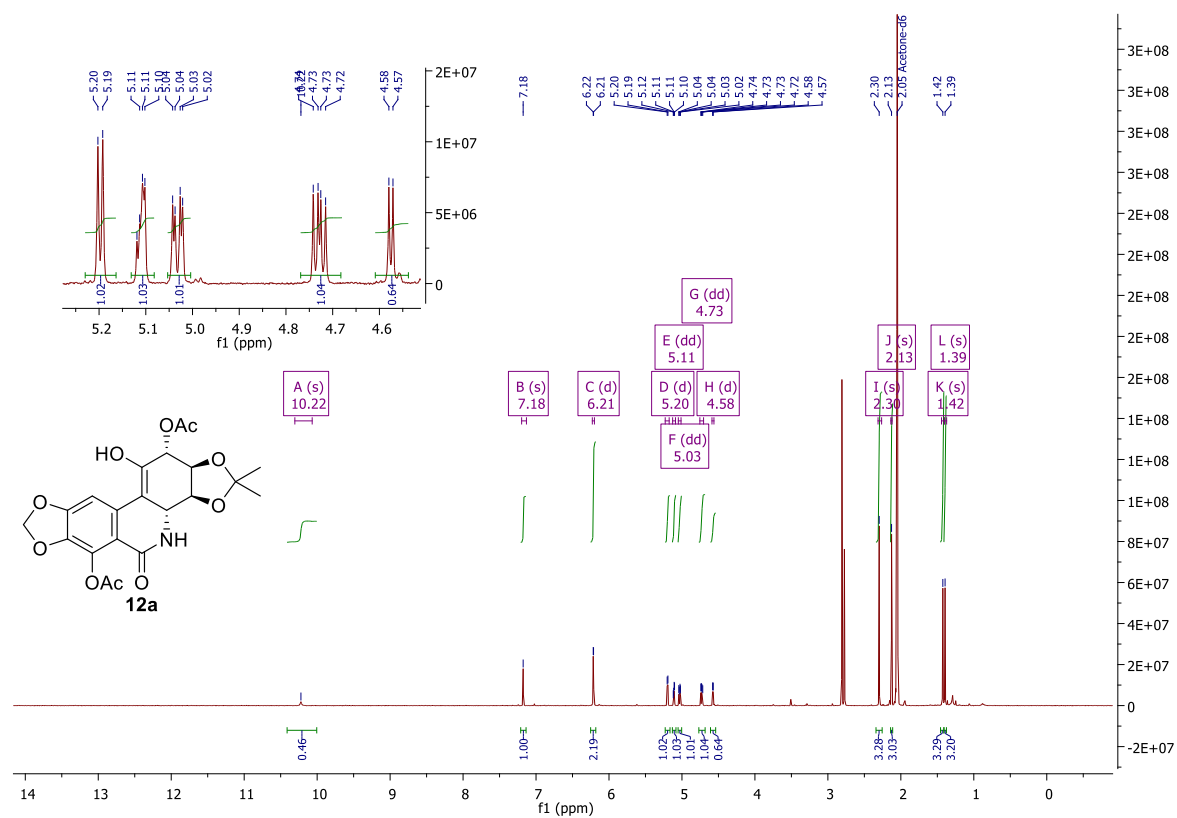

Figure S11.  $^{13}\text{C}$ -NMR of **12a**

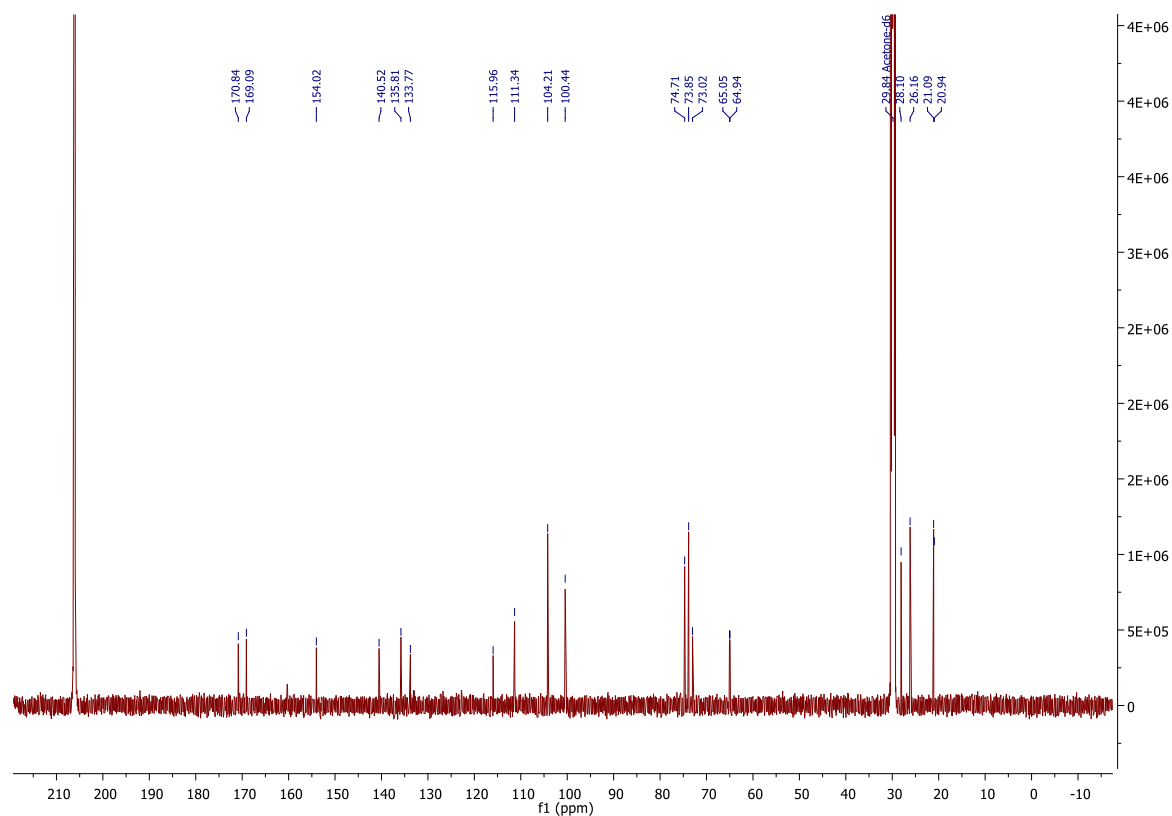

Figure S12.  $^1\text{H}$ -NMR of **12b**

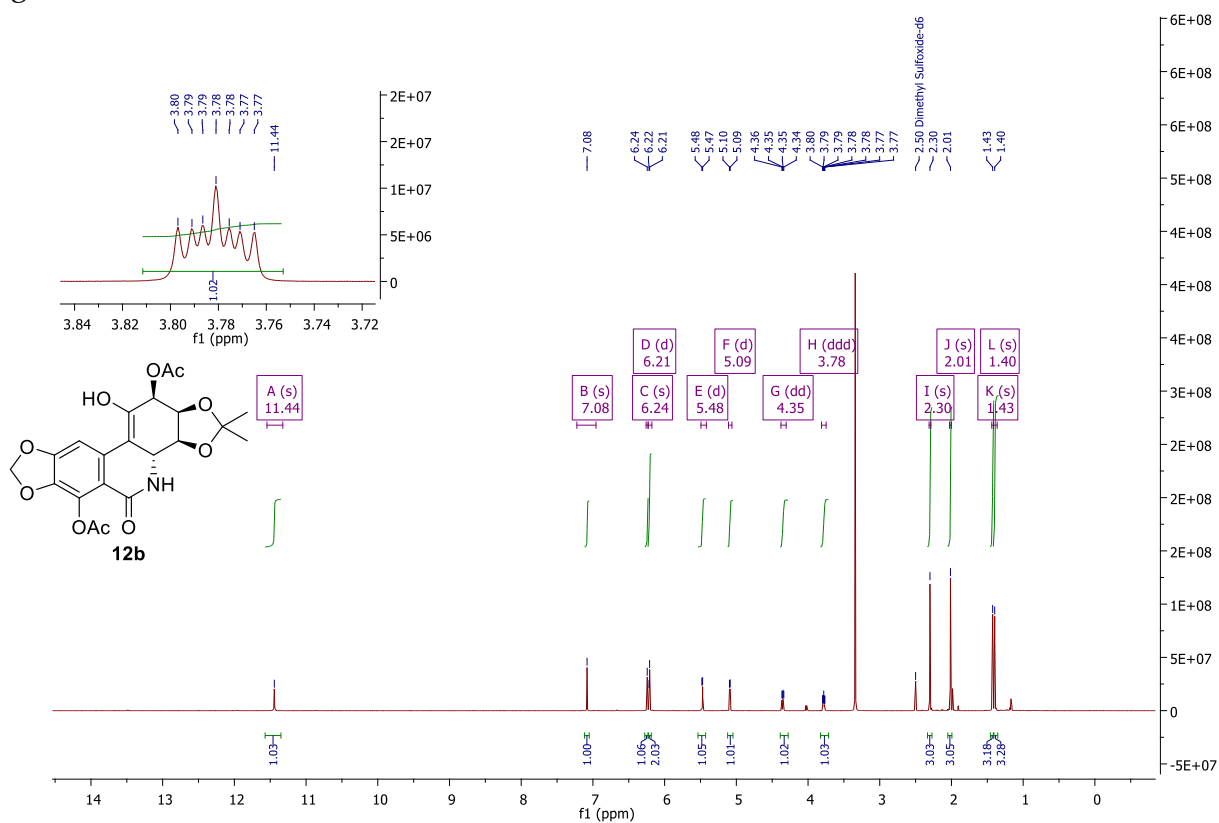

Figure S13.  $^{13}\text{C}$ -NMR of **12b**

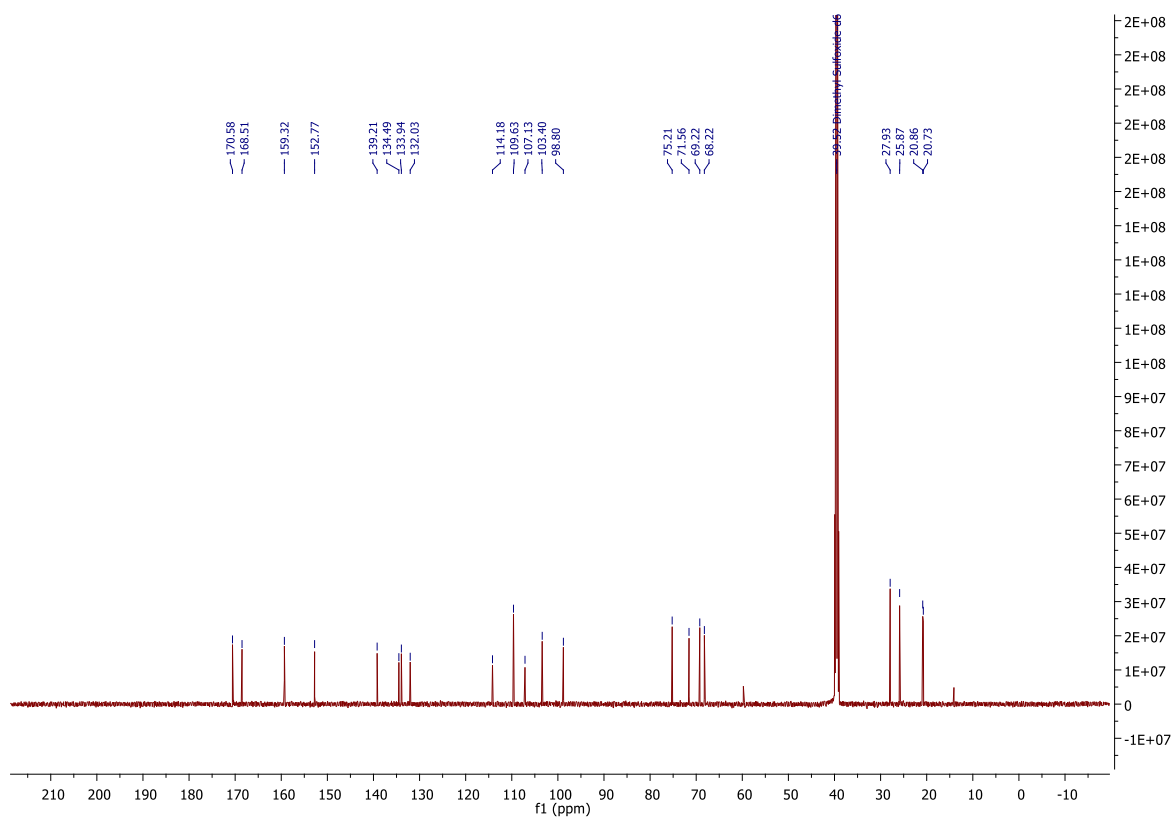

Figure S14.  $^1\text{H}$ -NMR of **14**

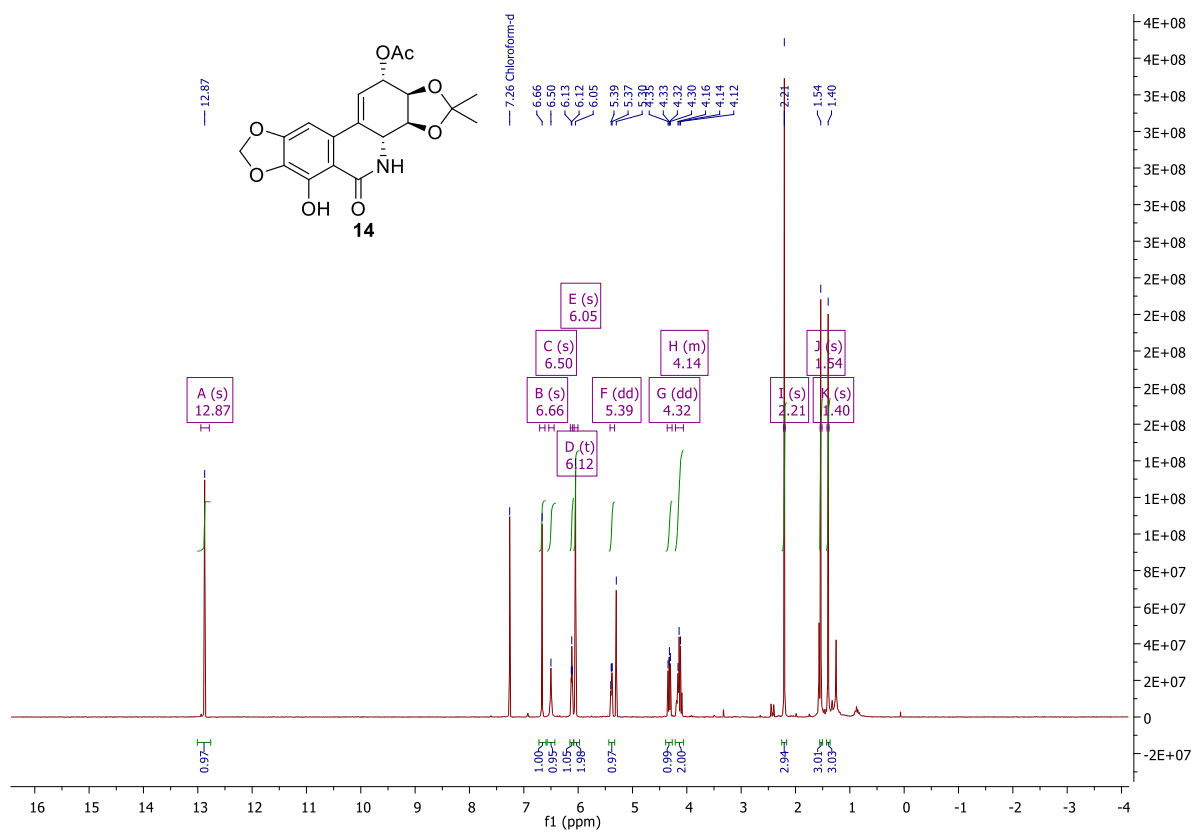

Figure S15.  $^{13}\text{C}$ -NMR of **14**

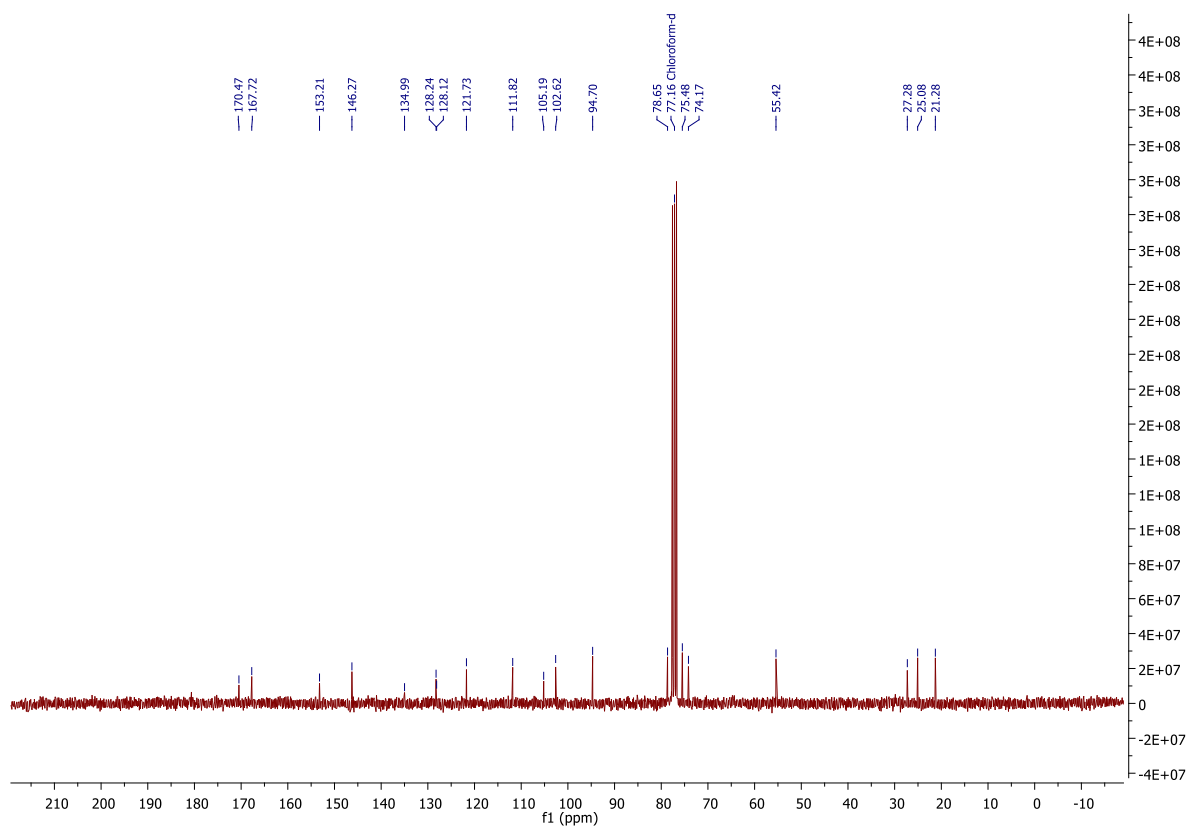

Figure S16.  $^1\text{H}$ -NMR of **15**

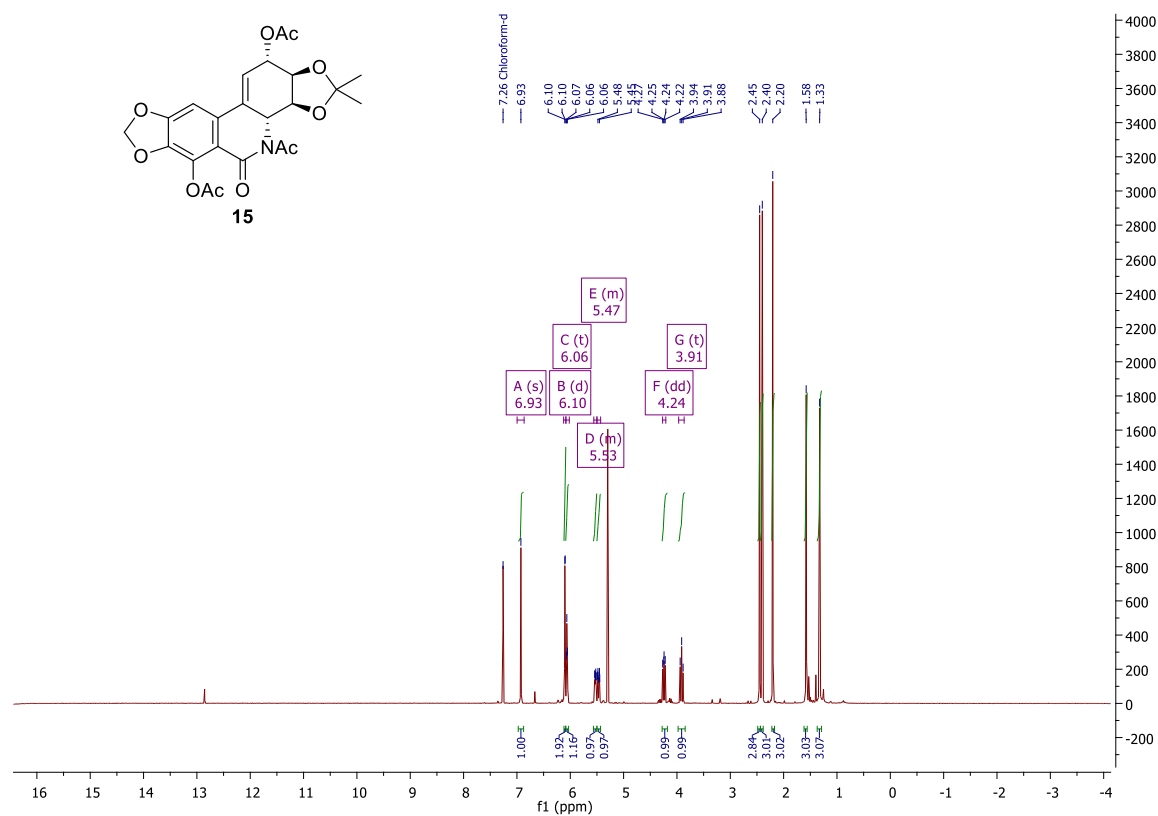

Figure S17.  $^{13}\text{C}$ -NMR of **15**

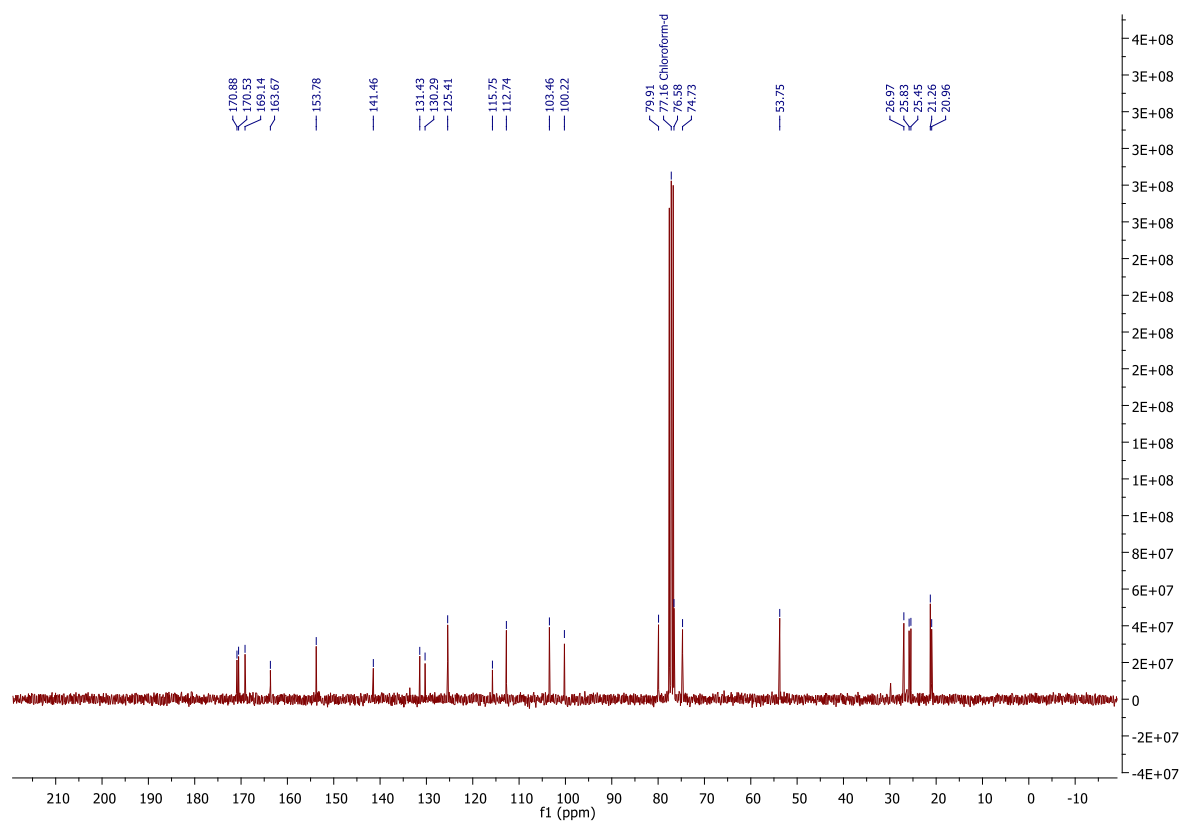

Figure S18.  $^1\text{H}$ -NMR of **16**

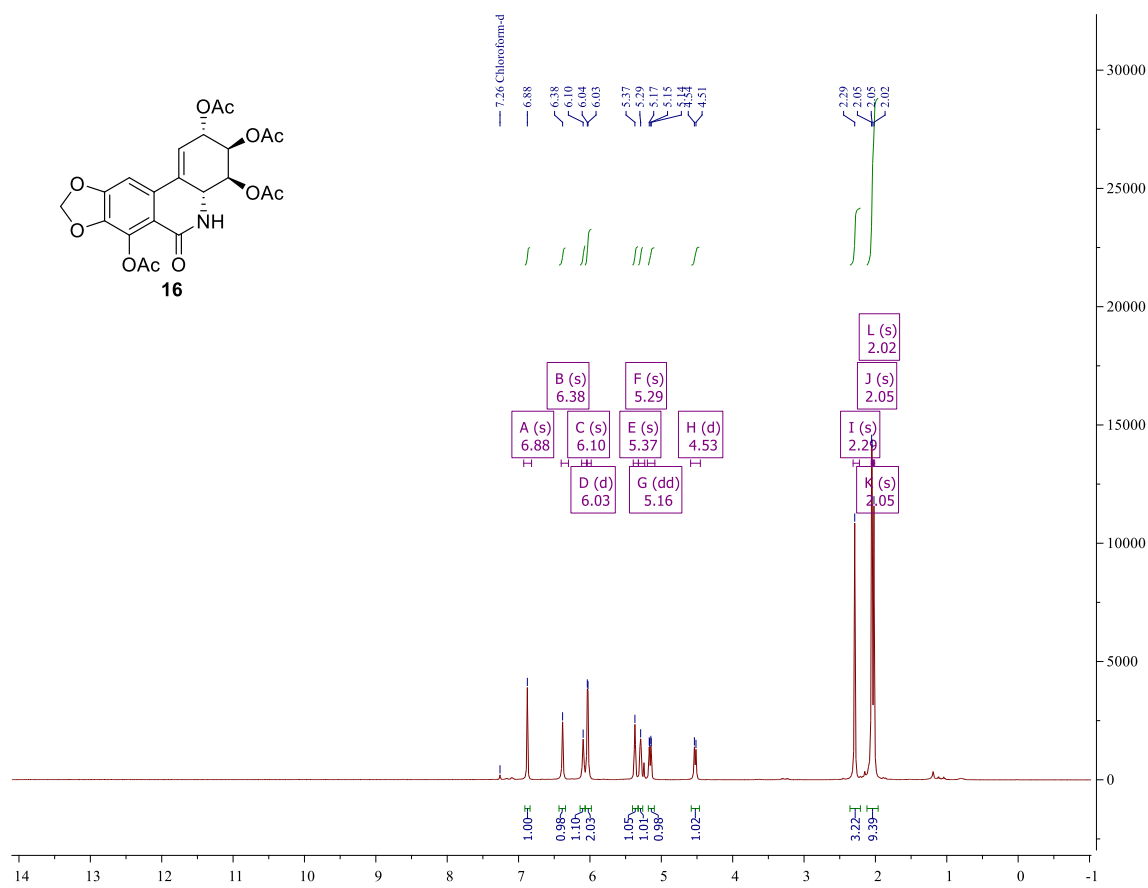

Figure S19.  $^{13}\text{C}$ -NMR of **16**

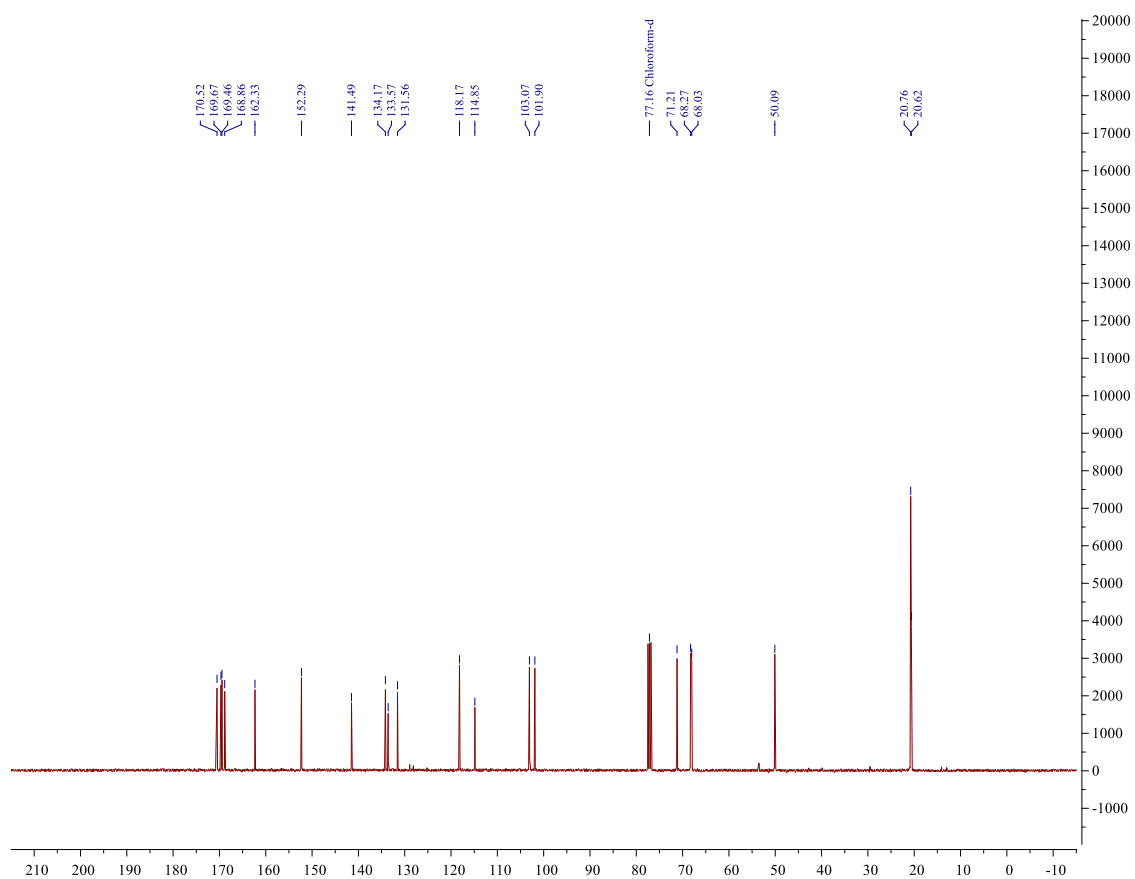

Figure S20.  $^1\text{H}$ -NMR of **17a**

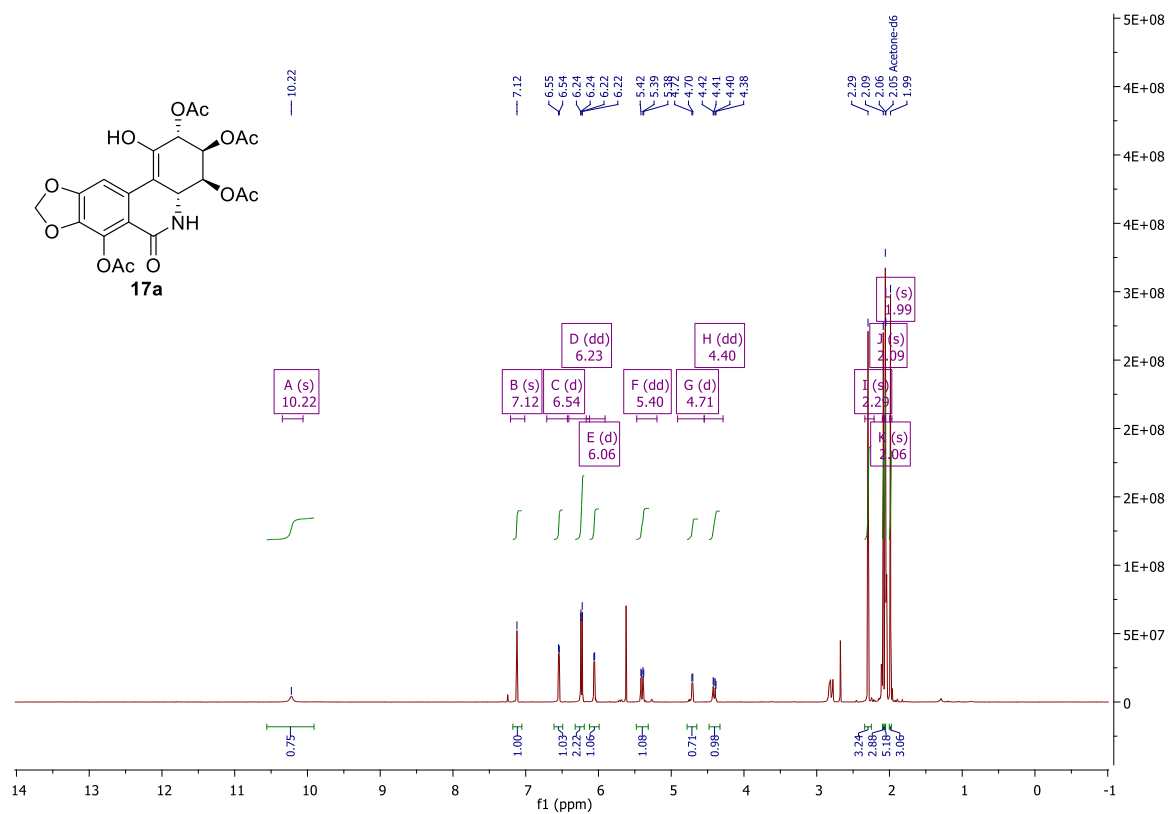

Figure S21.  $^{13}\text{C}$ -NMR of **17a**

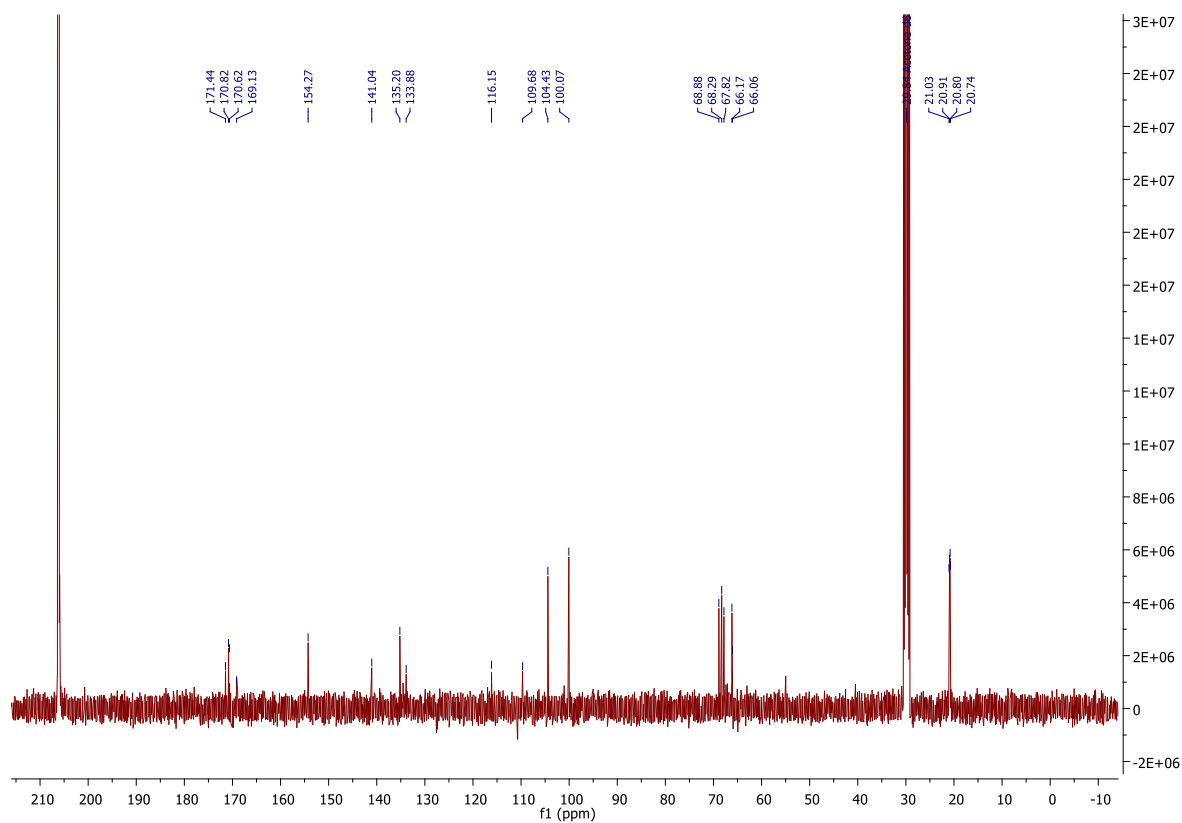

Figure S22. <sup>1</sup>H-NMR of **24**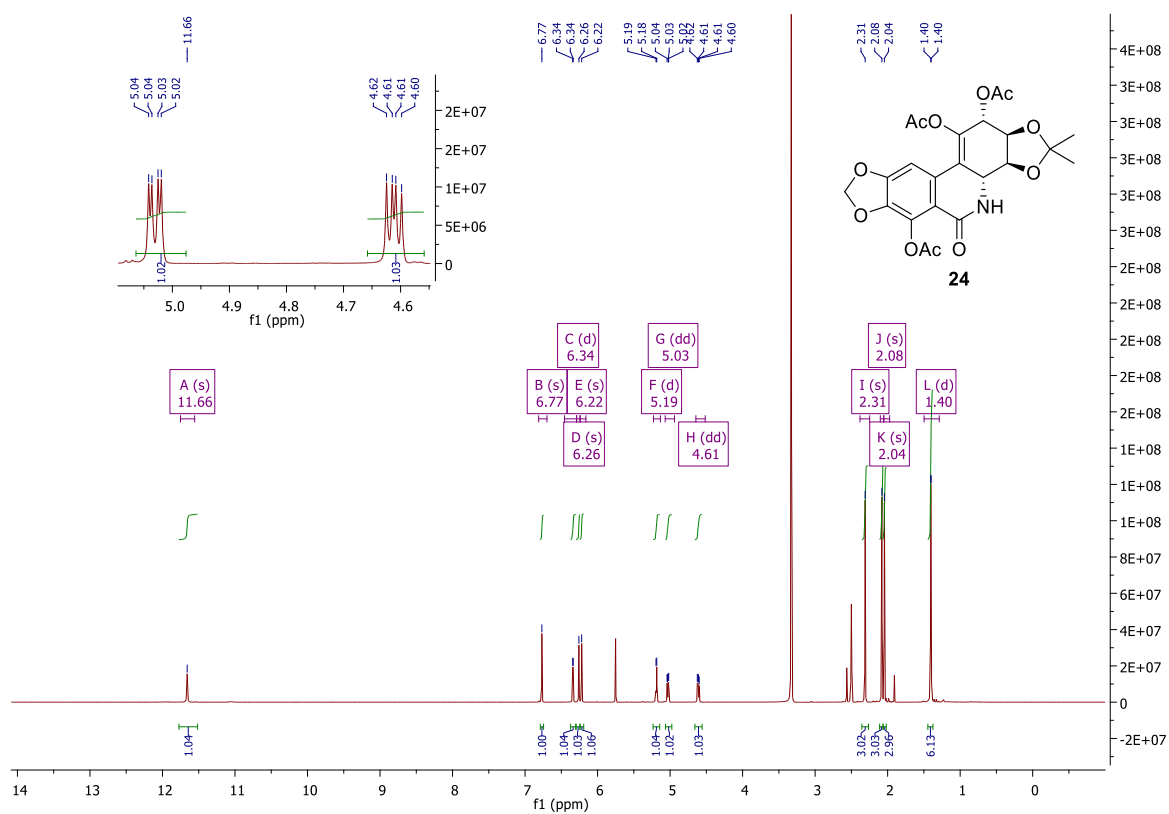

Figure S23.  $^{13}\text{C}$ -NMR of **24**

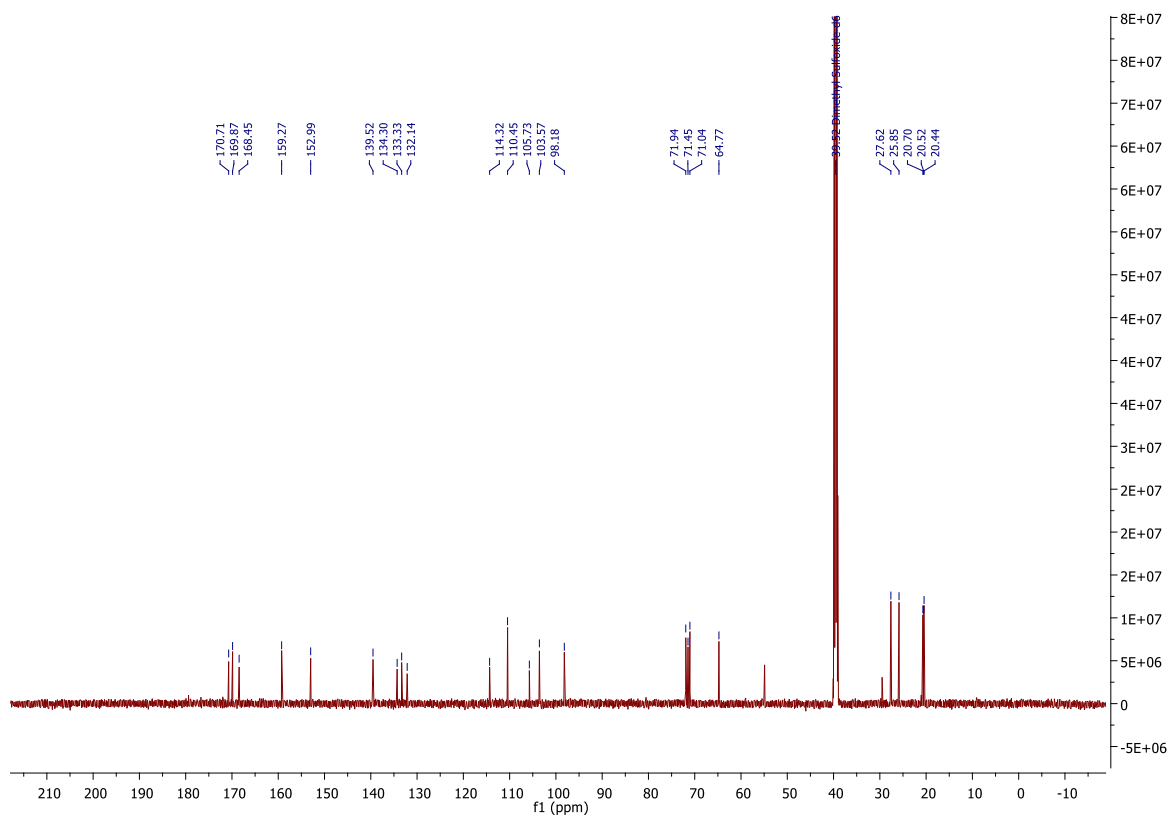



Figure S24.  $^1\text{H}$ - $^{15}\text{N}$  HSQC of **24**

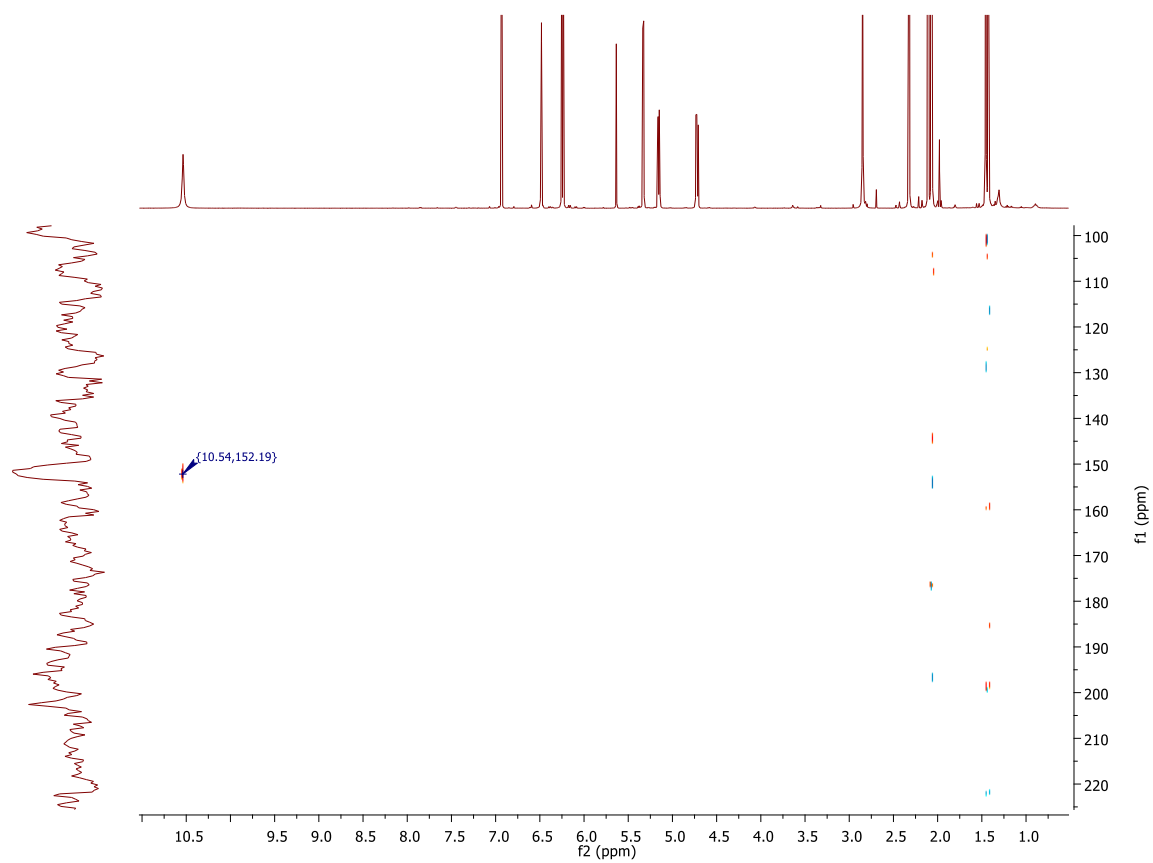

Figure S25.  $^1\text{H}$ - $^{15}\text{N}$  HMBC of **24**

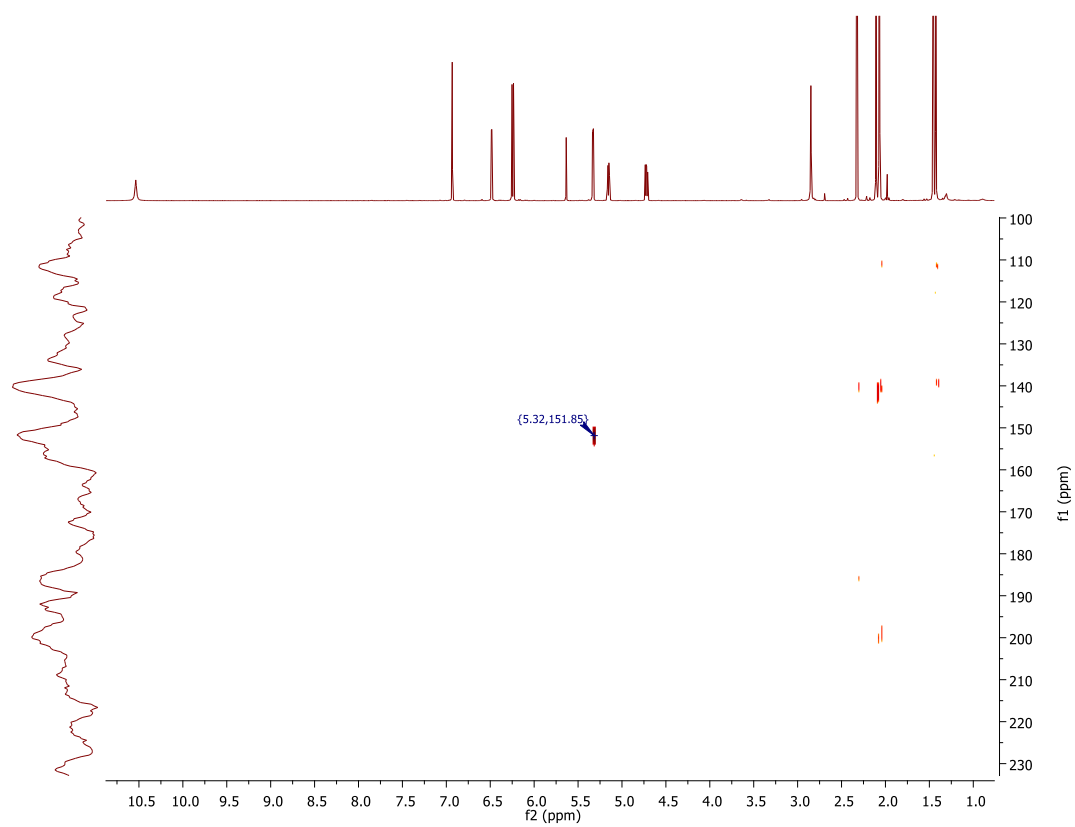

Figure S26.  $^1\text{H}$ -NMR of **25**

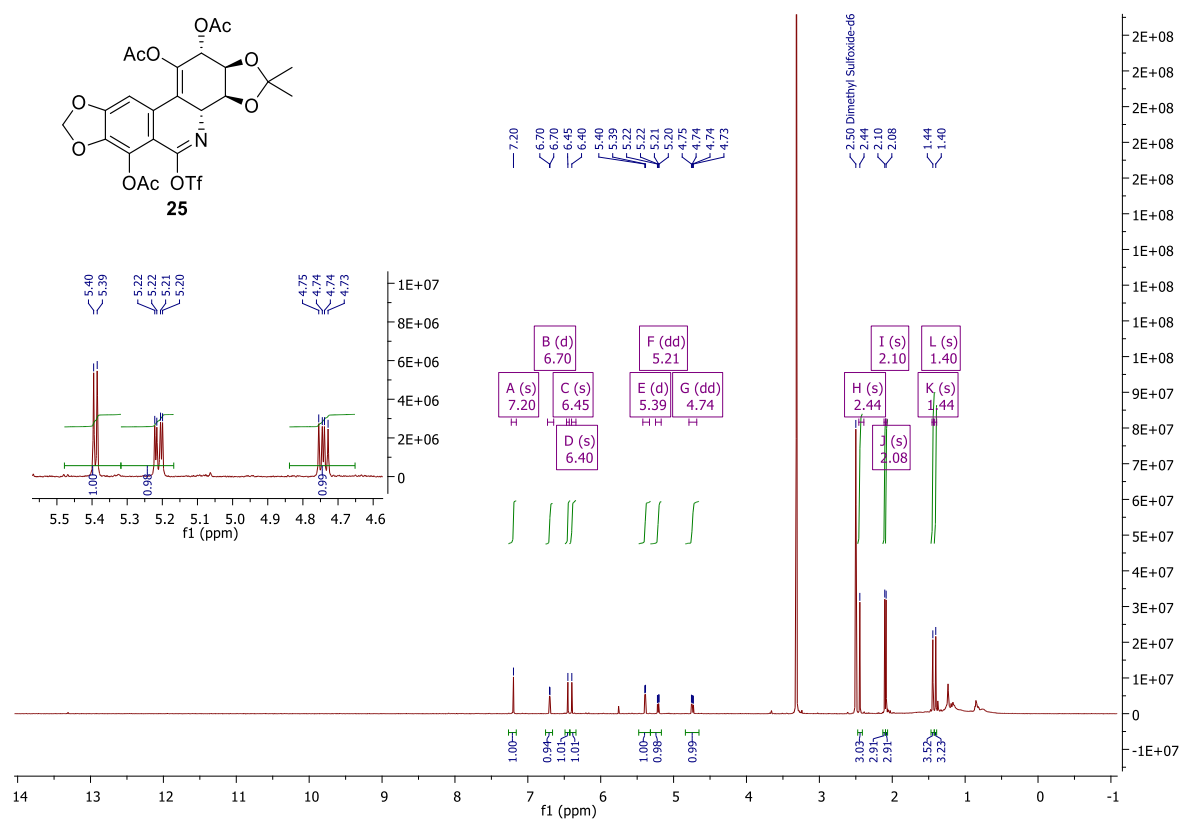

Figure S27.  $^{13}\text{C}$ -NMR of **25**

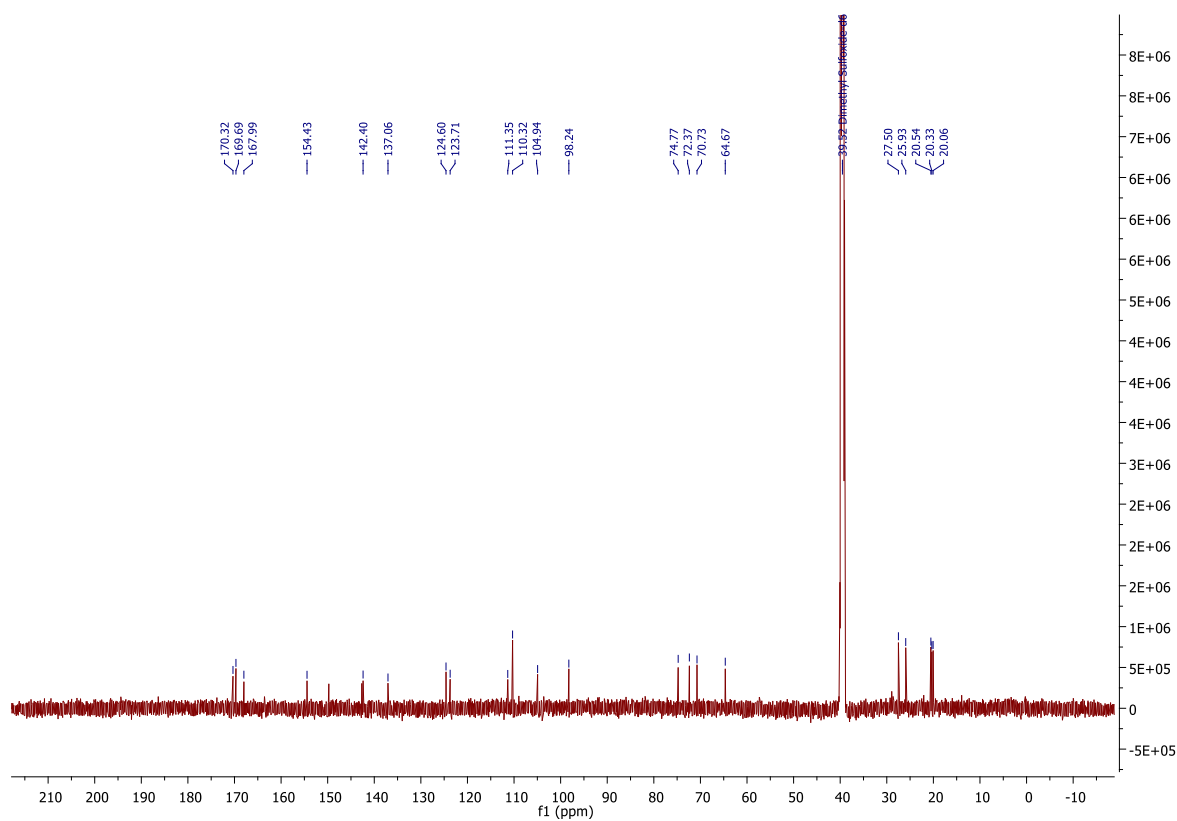

Figure S28.  $^{19}\text{F}$ -NMR of **25**

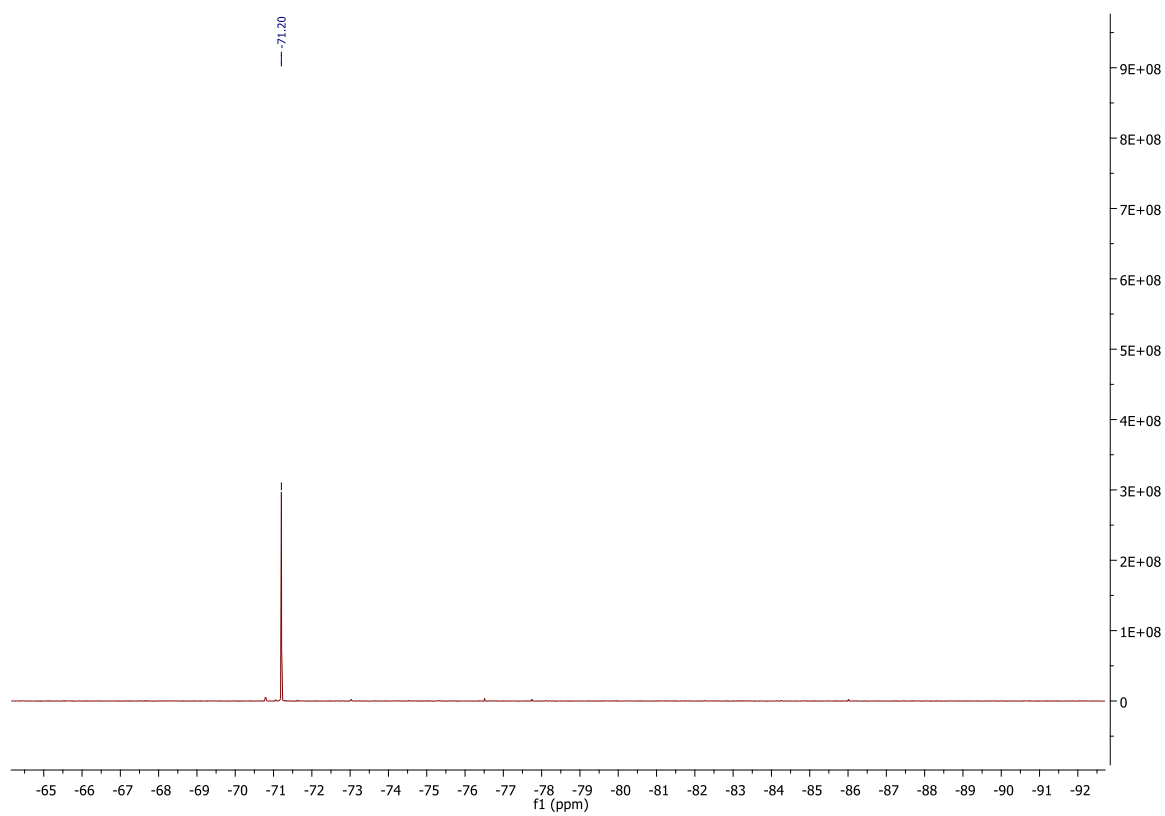

Figure S29.  $^1\text{H}$ -NMR of **26**

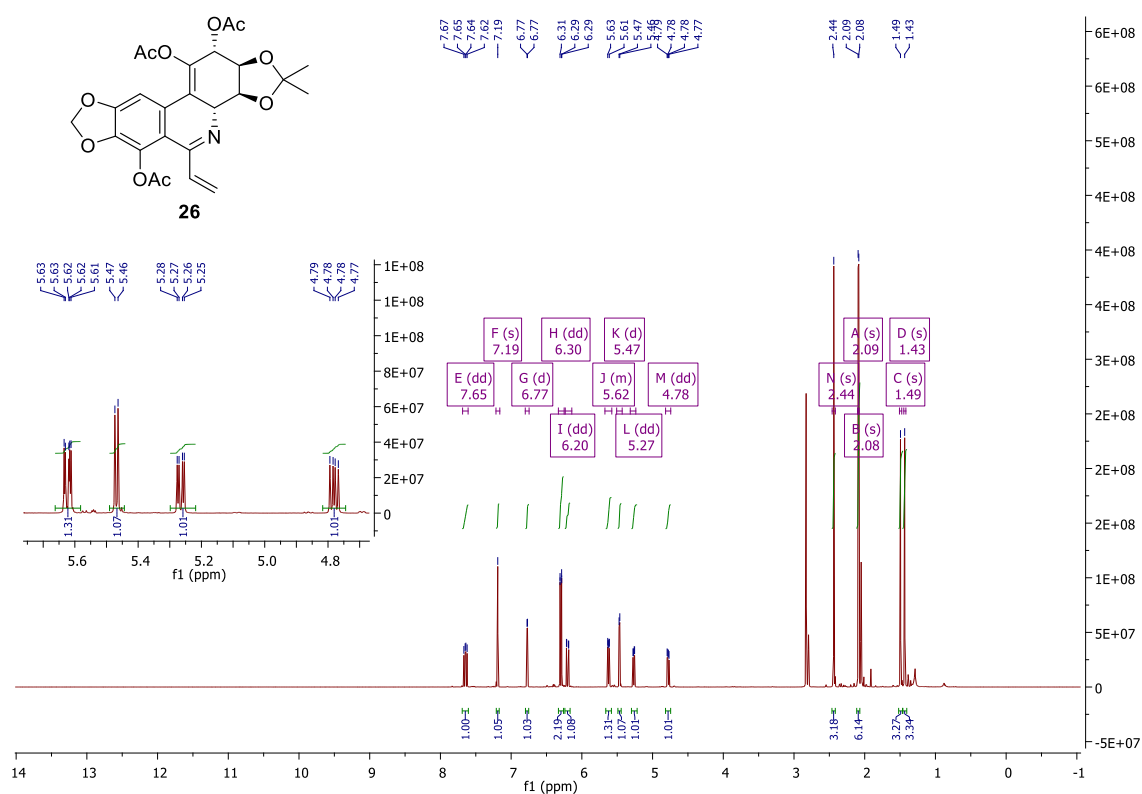

Figure S30.  $^{13}\text{C}$ -NMR of **26**

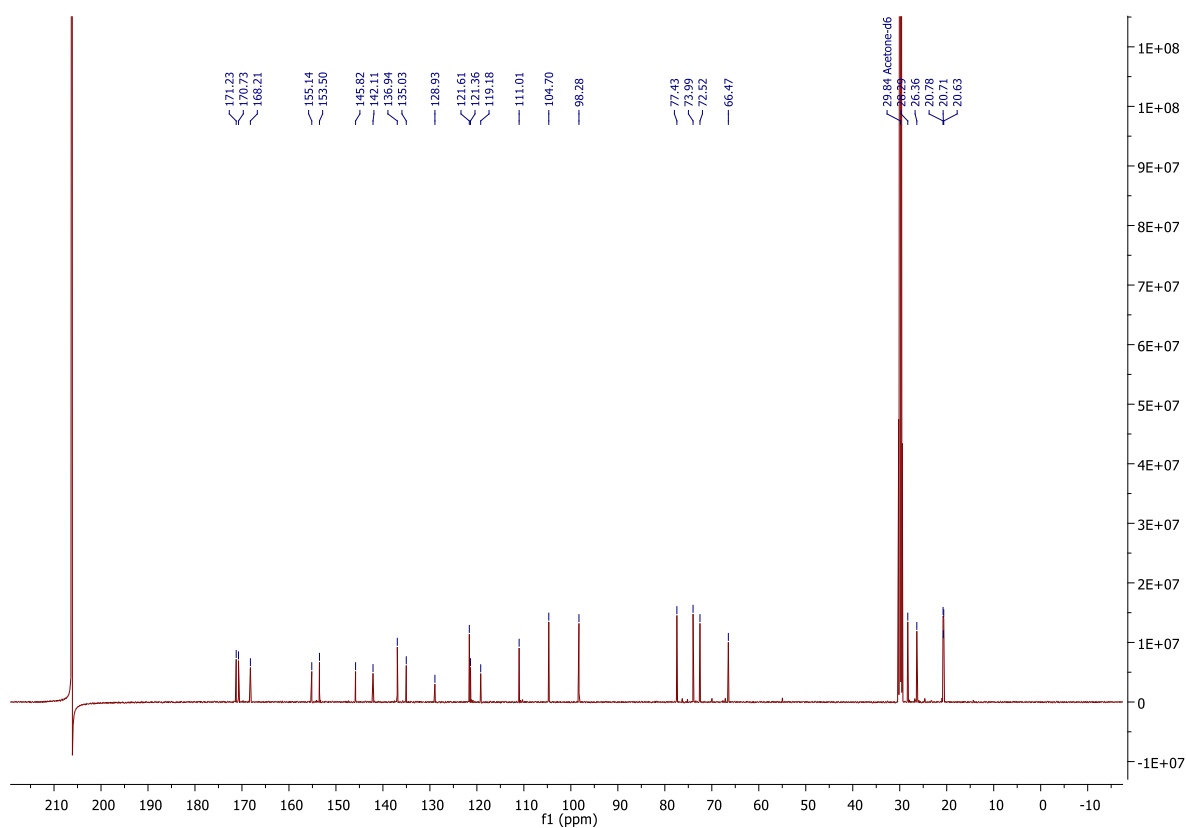

Figure S31.  $^1\text{H}$ - $^{15}\text{N}$  HMBC of **26**

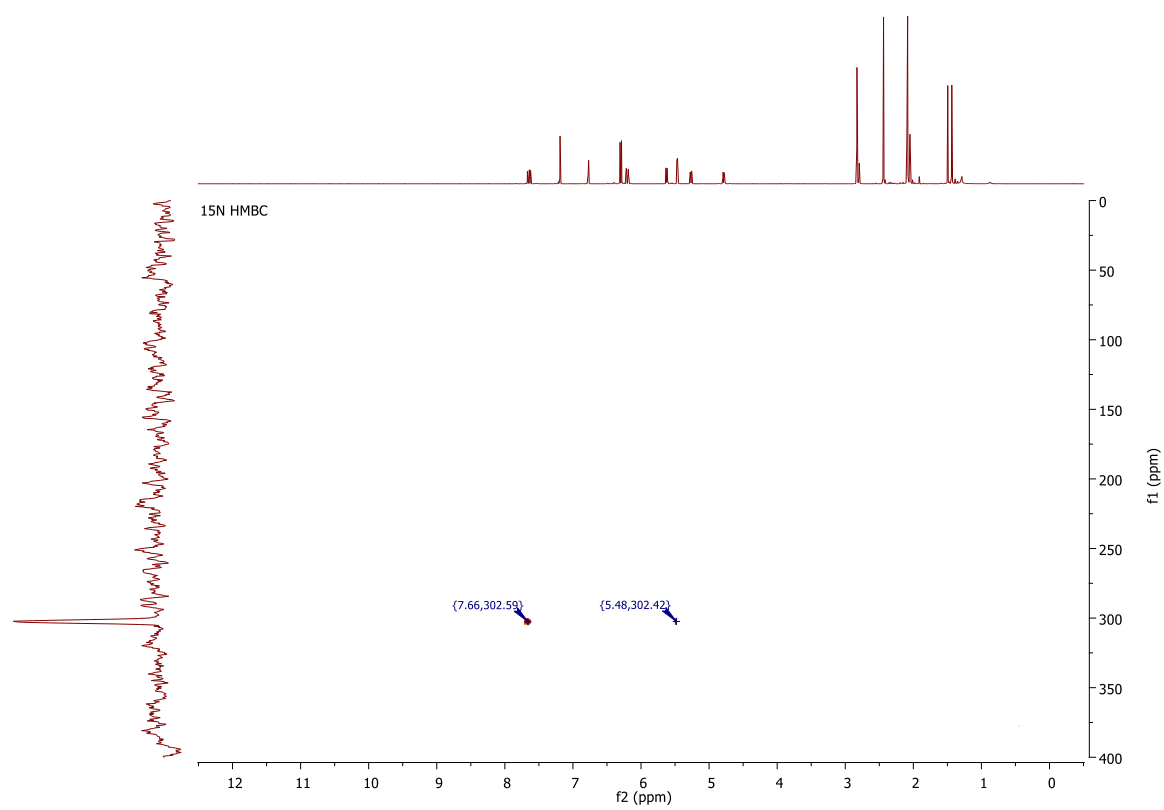

Figure S32.  $^1\text{H}$ -NMR of **27**

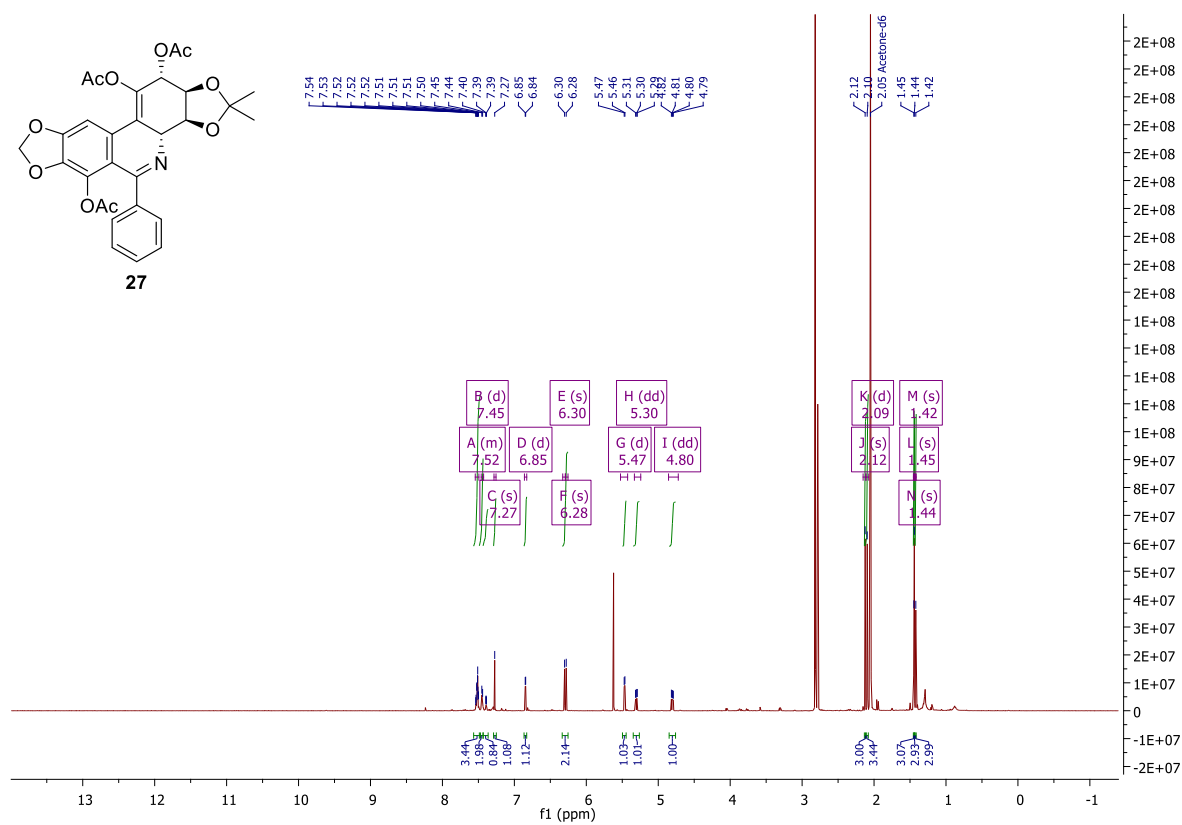

Figure S33.  $^{13}\text{C}$ -NMR of **27**

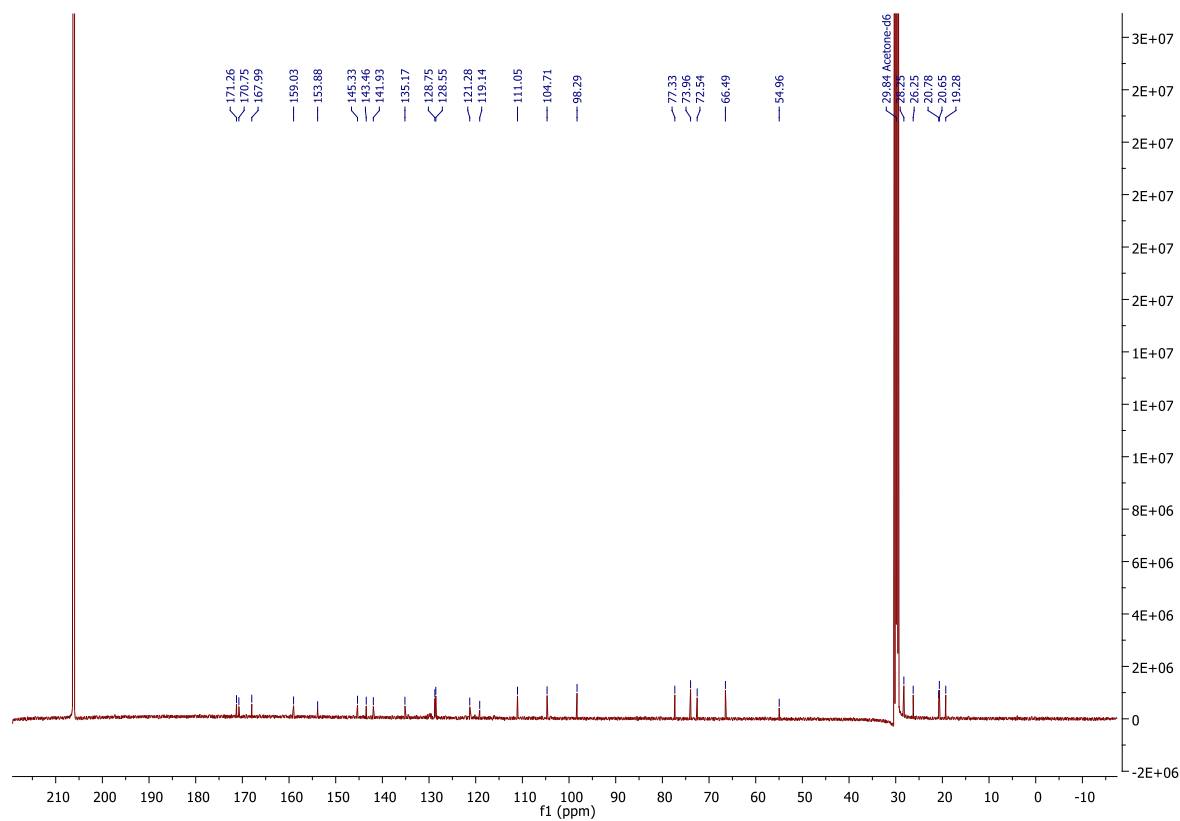

Figure S34.  $^1\text{H}$ -NMR of **28**

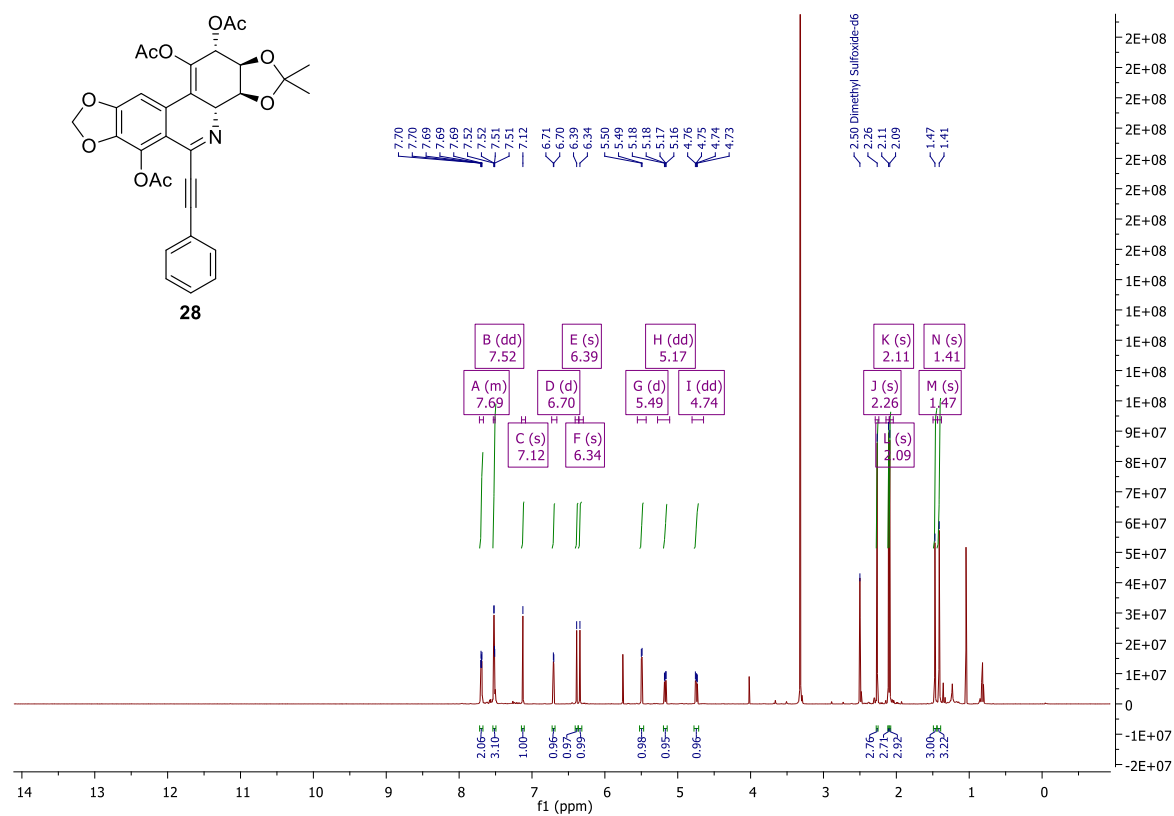

Figure S35.  $^{13}\text{C}$ -NMR of **28**

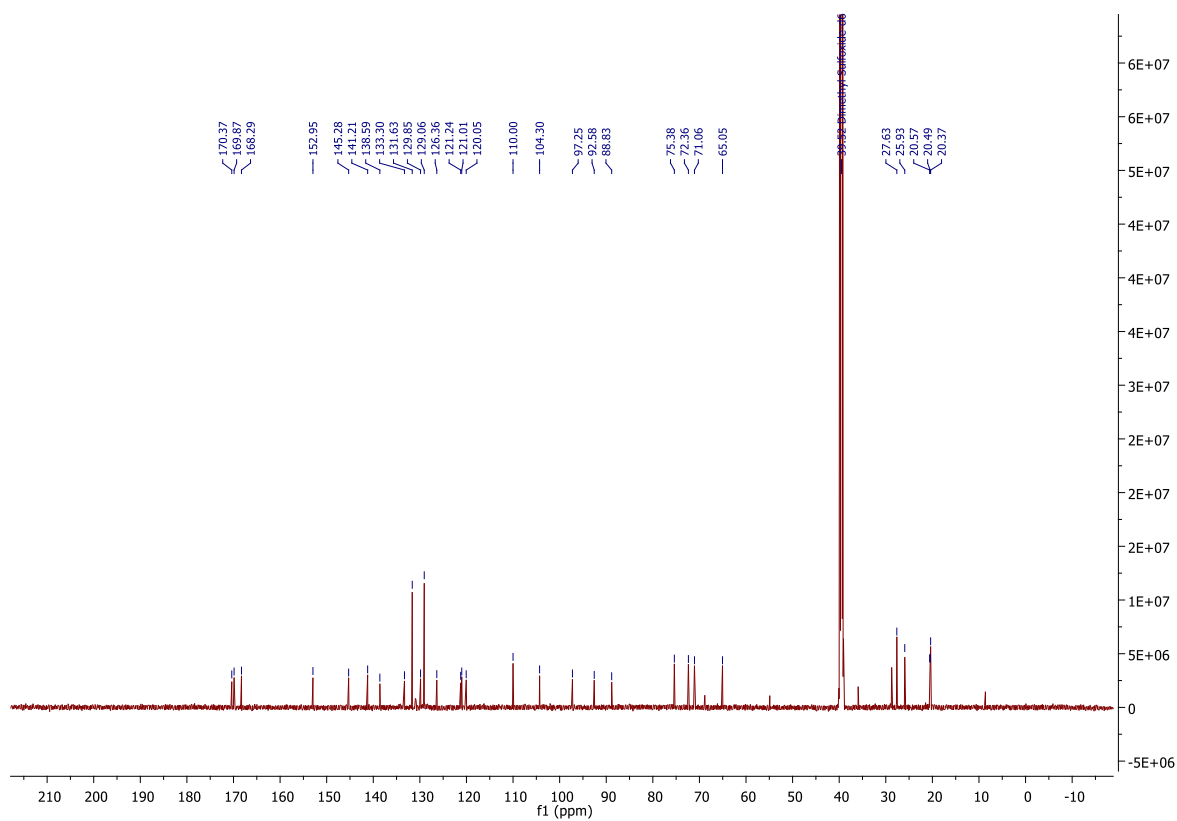

Figure S36.  $^1\text{H}$ -NMR of **29**

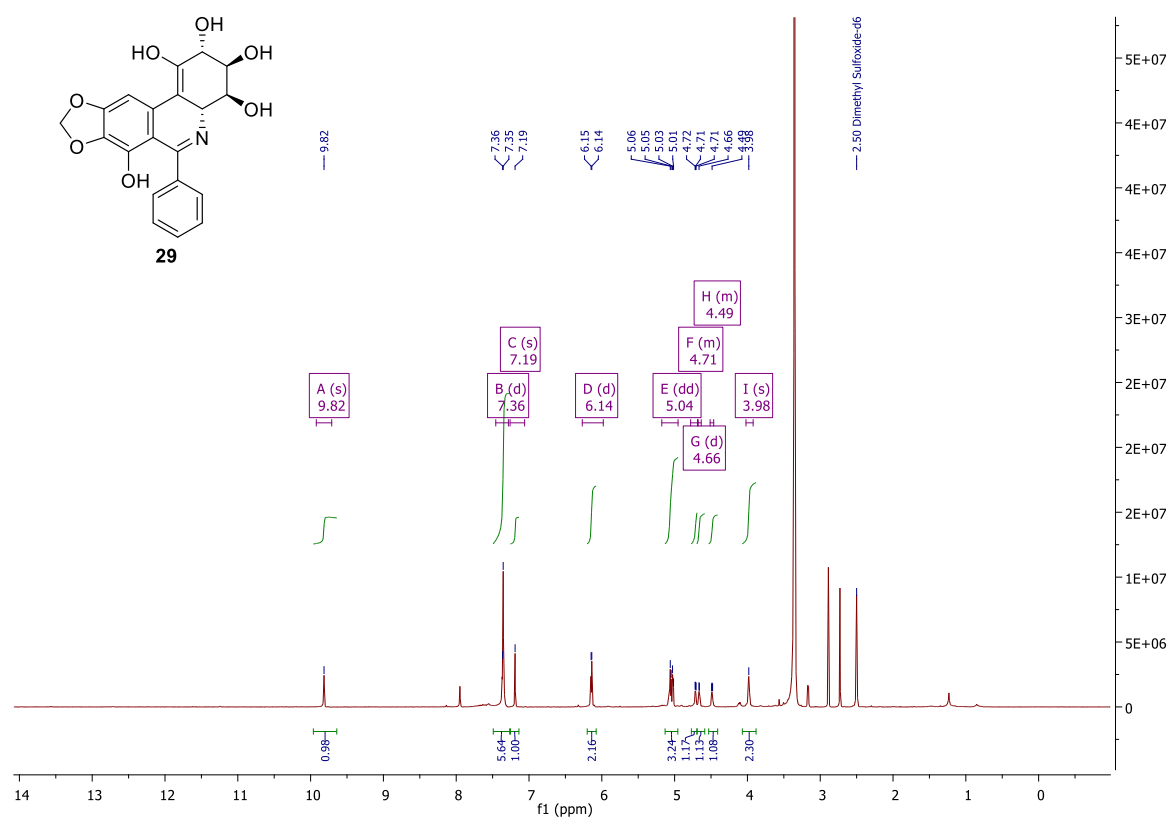

Figure S37.  $^{13}\text{C}$ -NMR of **29**

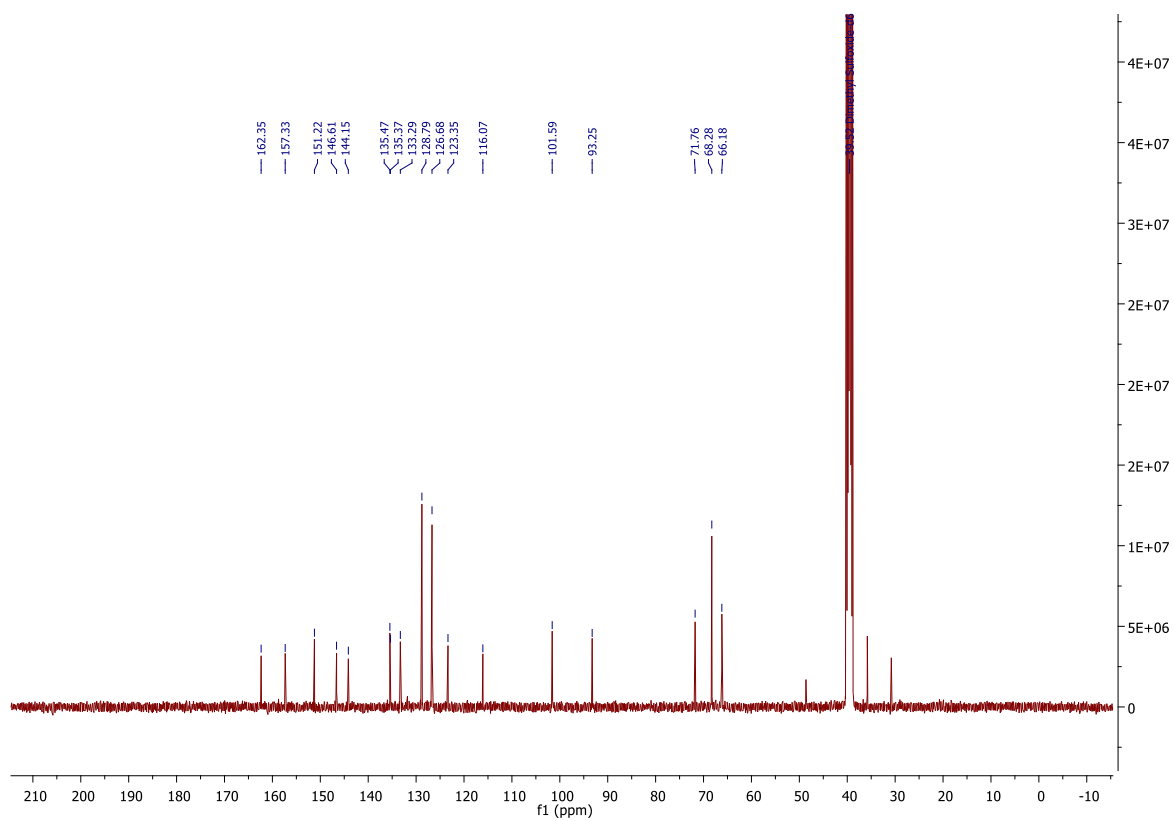



Figure S38.  $^1\text{H}$ -NMR of **30**

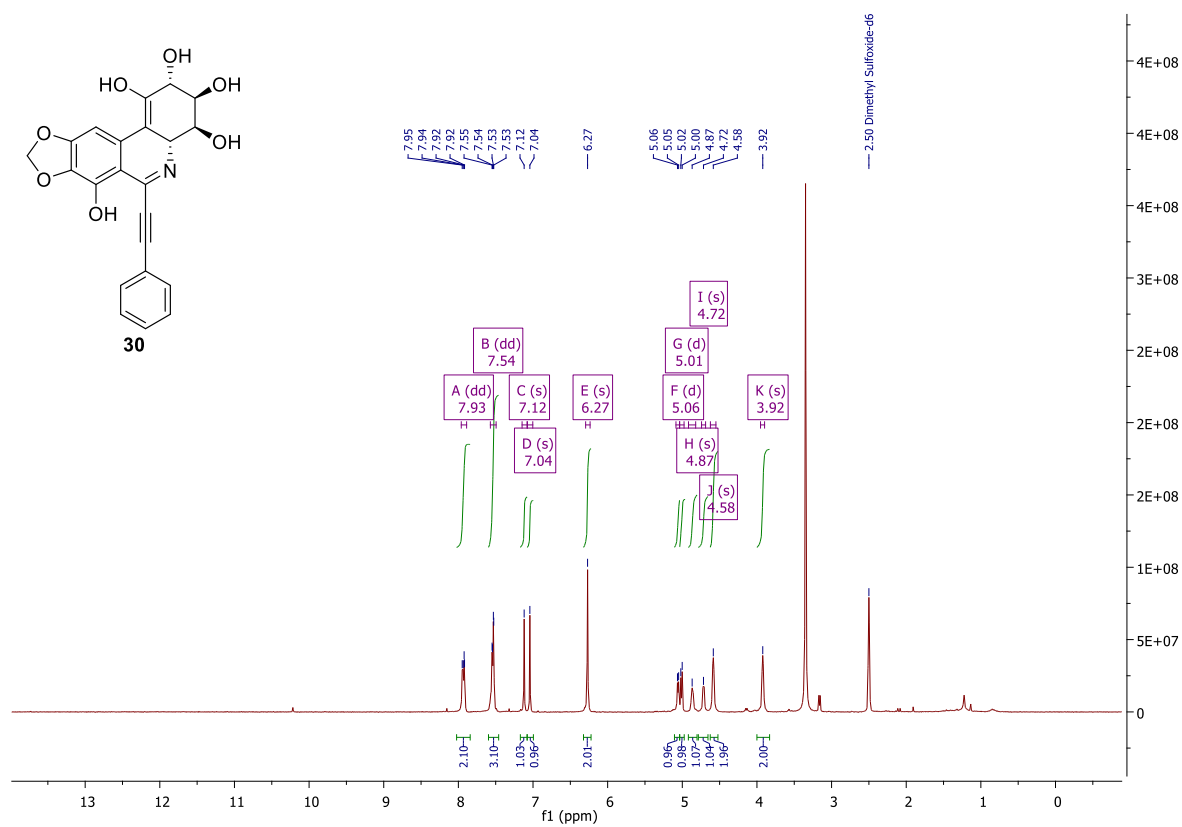

Figure S39.  $^{13}\text{C}$ -NMR of **30**

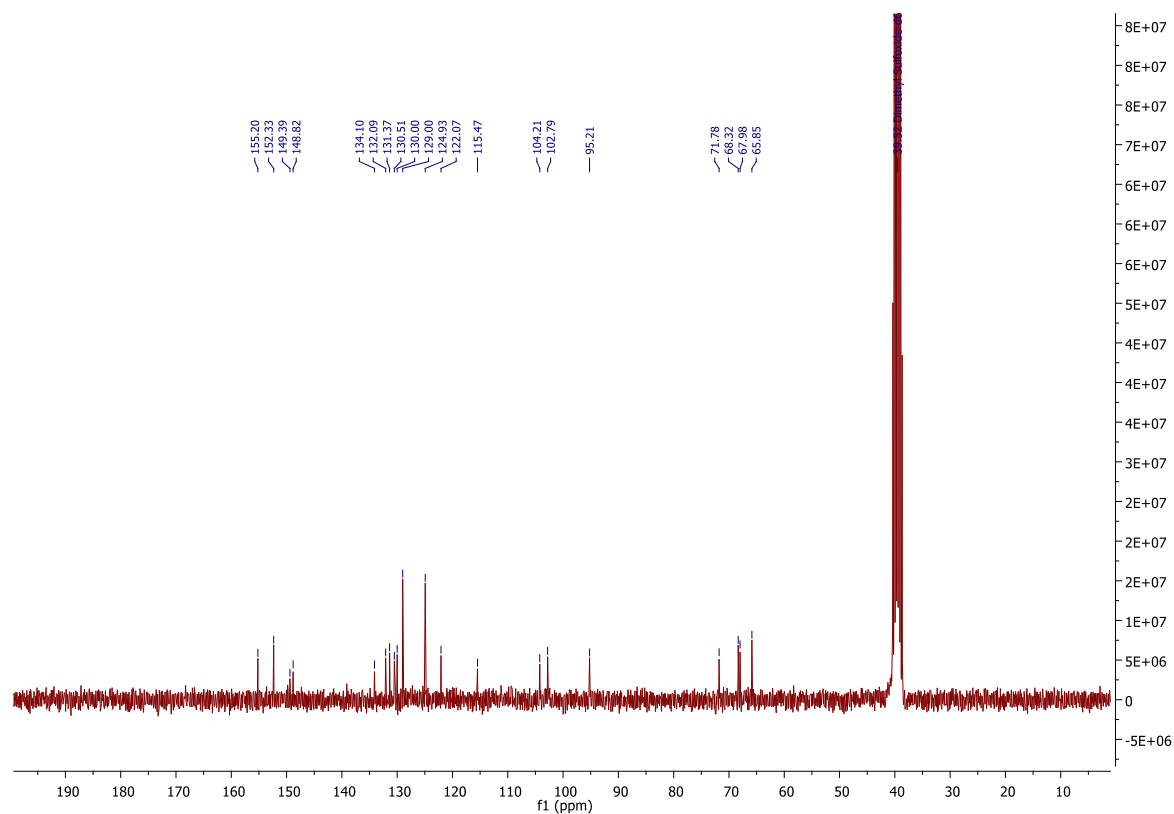

Figure S40.  $^1\text{H}$ -NMR of **31**

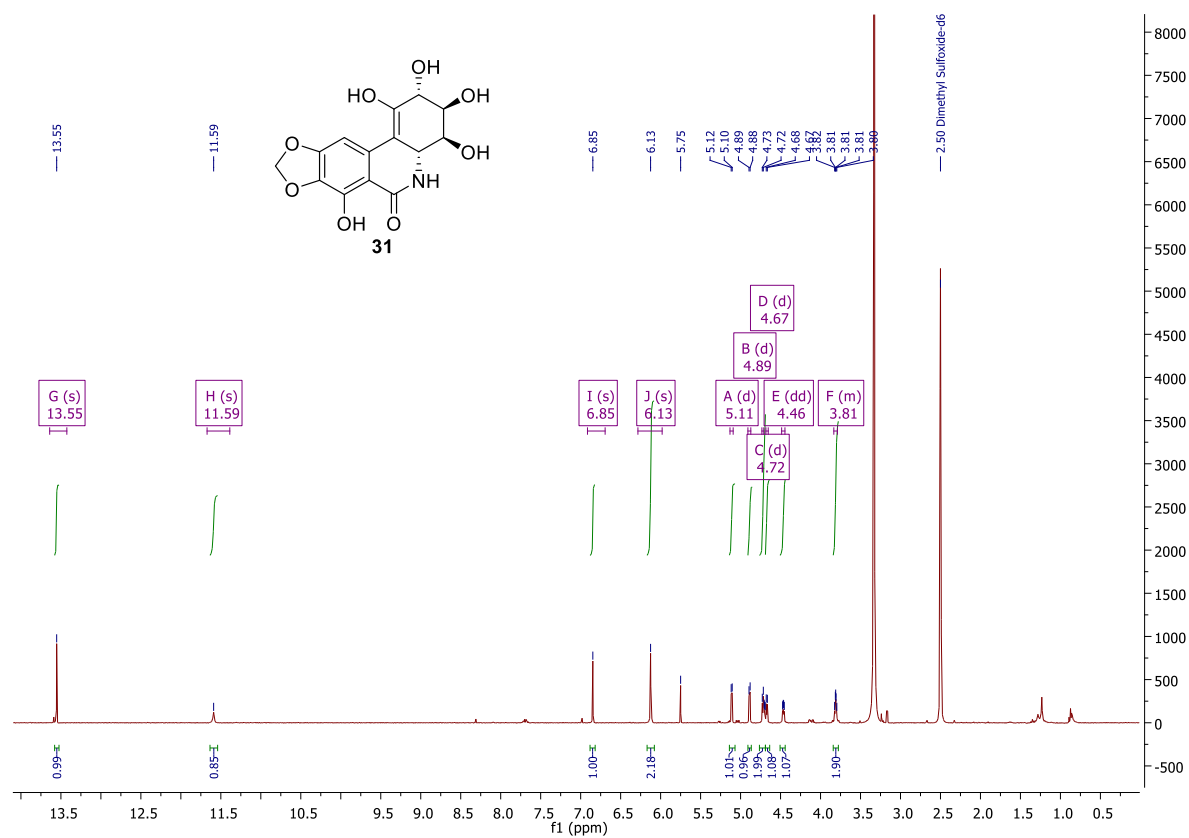

Figure S41.  $^{13}\text{C}$ -NMR of **31**

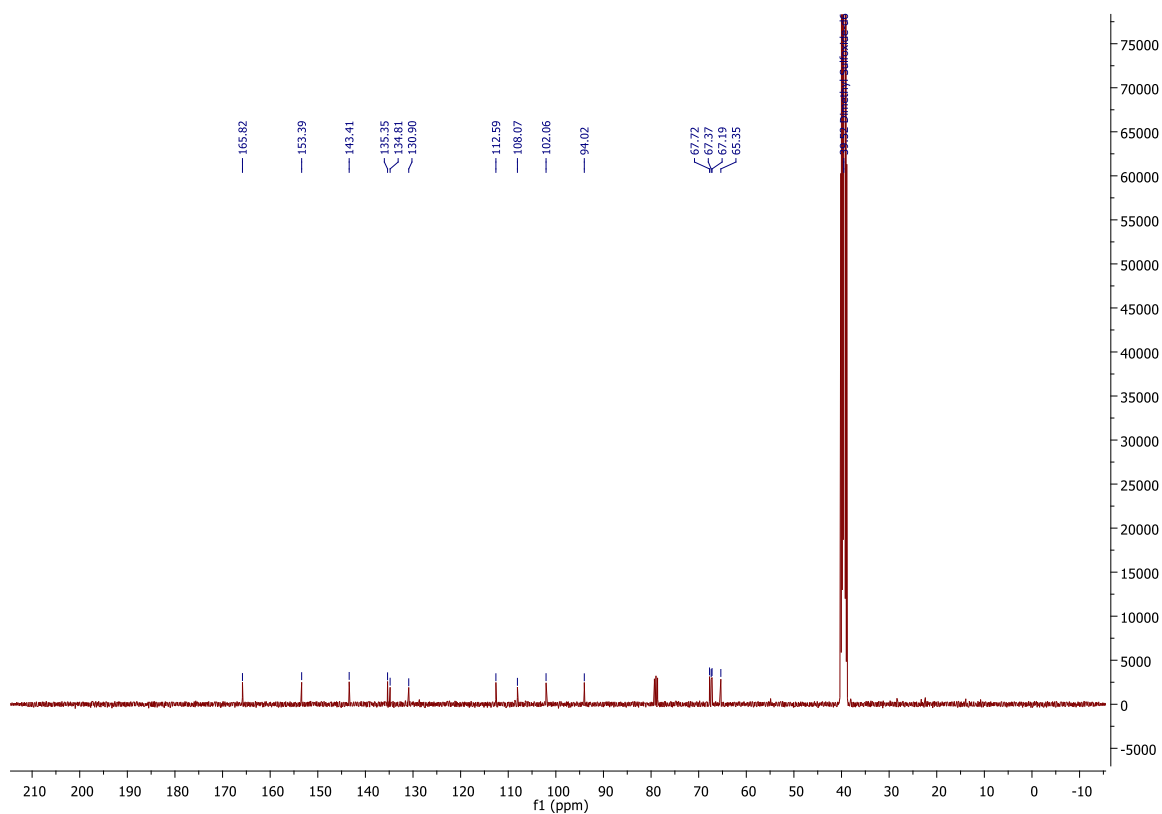

Figure S42.  $^1\text{H}$ -NMR of **33**

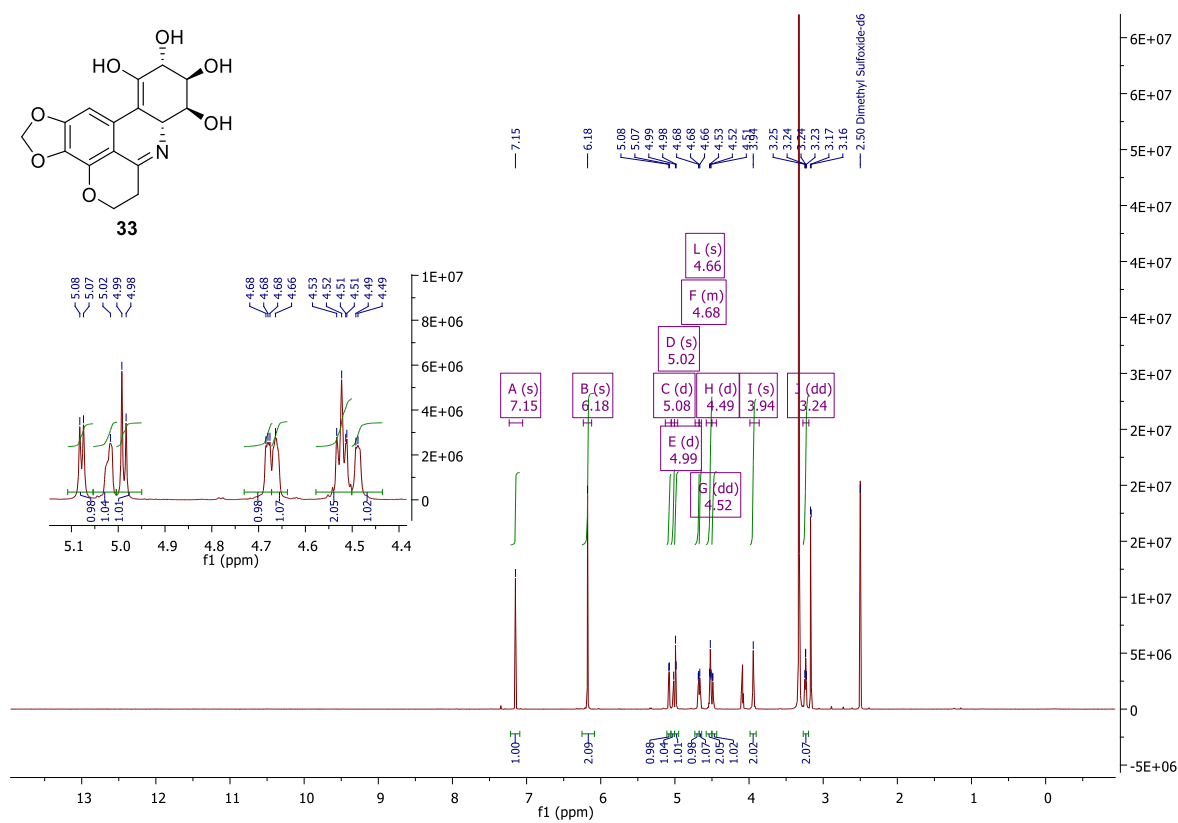

Figure S43.  $^{13}\text{C}$ -NMR of **33**

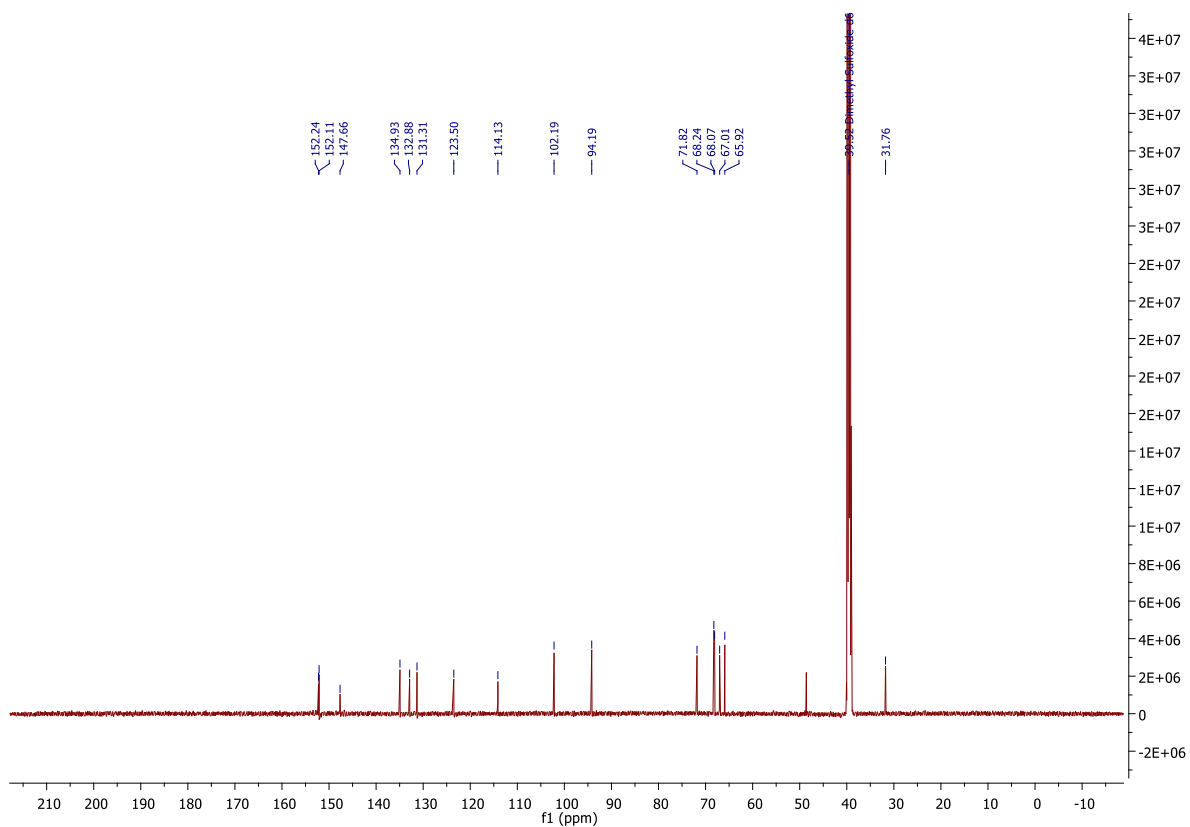

Supplement: s1 [file s1]
